1 Running Head: Attention and Working Memory

2 Reorienting Spatial Attention within Visual Working Memory

3

4

Sizhu Han<sup>1,</sup> , Yixuan Ku<sup>1,2,\*</sup>

5

6 1. The Shanghai Key Lab of Brain Functional Genomics, Shanghai

7 Changning-ECNU Mental Health Center, School of Psychology and Cognitive

8 Science, East China Normal University, Shanghai, China

9 2. NYU-ECNU Institute of Brain and Cognitive Science, NYU Shanghai and

10 Collaborative Innovation Center for Brain Science, Shanghai, China

11

12 \* correspondence: Yixuan Ku, [kuyixuan@gmail.com](mailto:kuyixuan@gmail.com)

13

14 **Abstract**

15 Attention and working memory (WM) are intertwined core cognitive processes.  
16 Through four experiments with 133 participants, we dissociated the impact of  
17 two types of covert spatial attention, endogenous vs. exogenous, on visual WM.  
18 Behavioral results consistently indicated that exogenous attentional cues were  
19 more advantageous than endogenous ones in enhancing the precision of visual  
20 WM under load-2, while they equalized under load-4. In addition, physiological  
21 and neural data explained the mechanisms. Converging evidence from  
22 eye-tracking, electroencephalography, and magnetoencephalography  
23 suggested that fast attentional processing induced by exogenous cues lead to  
24 early top-down information from the dorsal lateral prefrontal cortex (DLPFC) to  
25 sensory cortices. The differential frontal activities were further correlated with  
26 the behavioral distinctions between exogenous and endogenous cues, and  
27 transcranial magnetic stimulation over DLPFC at the same time period  
28 abolished the exogenous advantage. Taken together, traditionally considered  
29 bottom-up attentional processing induced by exogenous cues rapidly engages  
30 top-down signals from the frontal cortex, which leads to stronger behavioral  
31 benefits compared with the benefits produced by endogenous cues under the  
32 low load condition.

33

34 **Keywords:** Visual working memory; spatial attention; exogenous; endogenous;  
35 top-down control

36

37

## 38 INTRODUCTION

39 Working memory (WM) is a critical ability to store and manipulate sensory  
40 information when it is no longer accessible in the environment (Baddeley, 1986).  
41 Visual working memory (VWM) capacity is severely limited (Cowan, 2001;  
42 Miller, 1956), but lies in the center of cognition and is linked to the general  
43 intelligence (Engle, Kane, & W Tuholski, 1999). VWM representations,  
44 however, are flexible (Van den Berg, Awh, & Ma, 2014) and could be influenced  
45 by retro-cues (Griffin & Nobre, 2003; Souza & Oberauer, 2016), indicating  
46 interactions between attention and VWM.

47 As complex as memory, attention also has many different sub-types from  
48 distinct standards of classification (Cowan, 2017; Carrasco, 2011; Fan,  
49 McCandliss, Fossella, Flombaum, & Posner, 2005; Posner, 1980). Since  
50 William James, attention has been divided into two types: one that is reflexive  
51 and involuntary, and another that is active and voluntary (James, Burkhardt,  
52 Bowers, & Skrupskelis, 1890; Johnston & Dark, 1986). These two kinds of  
53 attention correspond to bottom-up and top-down attention from neural views  
54 (Buschman & Miller, 2007; Hahn, Ross, & Stein, 2006; Theeuwes, 2010).  
55 Covert attention, as opposed to overt attention, is the attentional deployment  
56 towards peripheral locations while the eyes gaze at the center. It can be  
57 directed by exogenous or endogenous cues, corresponding to the above  
58 reflexive/involuntary/bottom-up and active/voluntary/top-down ways  
59 respectively.

60 In the perception domain when the attentional cues are given prior to the  
61 sensory stimuli, a plethora of studies indicated that the exogenous attention  
62 processes rise (~100ms) and decay quickly (Liu, Stevens, & Carrasco, 2007;  
63 Remington, Johnston, & Yantis, 1992), while the endogenous attention  
64 processes deploy slower (~300ms) but remains sustained (Busse, Katzner, &  
65 Treue, 2008). However, the two attentional effects over perception are  
66 normally equivalent given enough time for attention to deploy (See review in  
67 Carrasco, 2011), although there exist part of evidence claiming their behavioral  
68 difference when sensory signal-to-noise ratio is high (Lu & Doshier, 1998, 2000;  
69 Lu, Lesmes, & Doshier, 2002). Despite of their similar behavioral benefit, the  
70 two types of cues have already been suggested to induce neural processes

71 that involve overlapped but distinctive neural networks (Buschman & Miller,  
72 2007) (Chica, Bartolomeo, & Lupiáñez, 2013; Carrasco, 2011; Corbetta &  
73 Shulman, 2002), supporting the dissociated neural view of bottom-up vs.  
74 top-down.

75         Meanwhile, in the memory domain when the attentional cues are given  
76 during the delay period after the sensory stimuli disappear, many studies have  
77 suggested that the two attentional effects over memory representations can  
78 enhance behavioral performance (e.g., Astle, Summerfield, Griffin, & Nobre,  
79 2012; Brady & Hampton, 2018; Gözenman, Tanoue, Metoyer, & Berryhill, 2014;  
80 Günseli, van Moorselaar, Meeter, & Olivers, 2015; Lepsien & Nobre, 2006;  
81 Murray, Nobre, Clark, Cravo, & Stokes, 2013; Williams, Hong, Kang, Carlisle, &  
82 Woodman, 2013; Griffin & Nobre, 2003; Matsukura, Cosman, Roper, Vatterott,  
83 & Vecera, 2014; Pertzov et al., 2013; Tanoue & Berryhill, 2012). However, none  
84 of them have found significant difference between them. There might be  
85 several reasons for such null effects. First, insensitive binary report with a  
86 change detection task (Shimi, Nobre, Astle, & Scerif, 2014) may not catch their  
87 subtle difference. Second, relatively high task difficulty (load 4) with a  
88 free-recall task (Pertzov et al., 2013) is similar to the condition of low  
89 signal-to-noise ratio in the perception domain. Increasing the memory  
90 signal-to-noise ratio might reveal the distinctions in the memory domain, given  
91 several findings of the differences in the perceptual domain when the  
92 sensory-to-noise ratio is high (Lu & Doshier, 1998, 2000; Lu, Lesmes, & Doshier,  
93 2002). Third, the effects of endogenous and exogenous cues in the memory  
94 domain are truly similar after excluding the above two reasons. Nevertheless,  
95 even if the endogenous and exogenous cues produce similar behavioral results  
96 in the memory domain, they may induce different neural processes and involve  
97 different neural networks, seeing that neural networks induced by them in the  
98 perceptual domain are distinctive (Buschman & Miller, 2000; Chica,  
99 Bartolomeo, & Lupiáñez, 2013; Carrasco, 2011; Corbetta & Shulman, 2002)  
100 and previous studies indicate similarities between the neural circuits  
101 implemented in orienting attention towards representations in perception and  
102 memory (Awh & Jonides, 2001; Heuer & Schubö, 2016; Lepsien & Nobre, 2006;  
103 Myers, Walther, Wallis, Stokes, & Nobre, 2015).

104           Altogether, it urges experimental designs with more sensitive task, as well  
105 as varied levels of task difficulty, to reveal the potential difference between the  
106 endogenous and exogenous attentional effects in the memory domain, in such  
107 a way we could unify the attentional effects in both perception and memory.  
108 Moreover, neuroimaging methods with high temporal resolutions are needed to  
109 catch the potential difference in neural processes between them. Therefore, we  
110 conducted 4 experiments, combined with physiological and neural  
111 measurements, including eye-tracker, electroencephalography (EEG),  
112 magnetoencephalography (MEG), and transcranial magnetic stimulation (TMS),  
113 to address the following two questions: 1) whether there is a behavioral or  
114 neural difference between the endogenous and exogenous attentional effects  
115 in the memory domain? 2) If there exists a difference, when and how the  
116 endogenous and exogenous attentional effects differentiate?

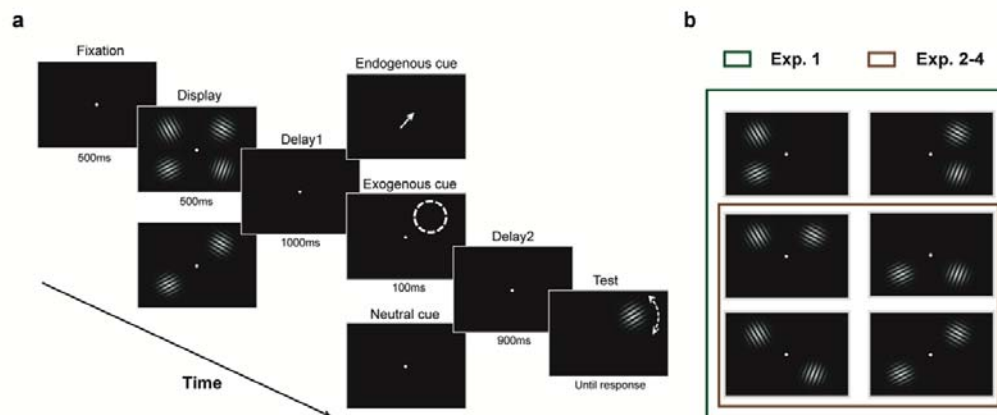

117  
118 **Figure 1 | Trial sequence.** a, Example of two types of valid retro-cue trials (endogenous  
119 and exogenous cue) and of a no cue trial. b, Configurations of the display that was set to  
120 load-2 in four experiments.

121

## 122 RESULTS

### 123 Experiment 1

124           In the first experiment, a total of 64 participants were requested to  
125 memorize two or four oriented Gabor patches (presented for 500 ms) that  
126 differed by at least 10 degrees. After a delay of 2 s, one of the Gabor patches  
127 was probed. The participants reproduced its orientation using a computer  
128 mouse as precisely as possible. In two thirds of all the experimental trials, a

129 retro-cue was presented in the middle of the 2 s delay. Half of the retro-cue  
130 trials used an endogenous cue (i.e. an arrow at the center of the screen) and  
131 the other half used an exogenous cue (i.e. a dashed circle outside of one of the  
132 Gabor patches). All cues were 100% valid, indicating the upcoming probed  
133 location. All trials were randomly presented. To control eye movements and  
134 blinks, gaze positions were on-line monitored during task performance (see  
135 Methods for more details).

136 As the best fitting model of memory recall task were still in debate (Adam,  
137 Vogel, & Awh, 2017; Ma, Husain, & Bays, 2014), we mainly focused on  
138 reporting the results from the raw circular standard deviation of the recall error  
139 (i.e. Raw SD). Six participants in experiment 1 were excluded from further  
140 analysis due to either poor performance (lower end in the group 99%  
141 confidence interval, the same below) in at least one condition (4 participants) or  
142 data missing (2 participants). Raw SD from the rest of 58 subjects was shown in  
143 Fig. 2a. Baseline-corrected pupillary diameters were calculated as an index to  
144 reflect physiological states (e.g. larger pupil size is associated with a higher  
145 level of arousal (Alnæs et al., 2014; Granholm & Steinhauer, 2004; Nassar et  
146 al., 2012)) over time. The pupillary diameters are illustrated in Fig. 3a-b. We  
147 performed two-way repeated measures ANOVAs with the within-subject factors  
148 of LOAD (2 and 4) and ATTENTION (endogenous, exogenous, and no-cue) for  
149 behavioral results. Post-hoc two-tailed t-tests were performed to examine the  
150 effect of ATTENTION under each load, and multiple comparisons were  
151 corrected using the false discovery rate (FDR) correction (the same for the  
152 following experiments).

153 2-by-3 ANOVAs on the Raw SD revealed that there were significant main  
154 effect of LOAD ( $F(1, 57) = 369.47, p = 1.4e-26, \eta_p^2 = 0.87$ ), significant main  
155 effect of ATTENTION ( $F(2, 114) = 46.21, p = 2.0e-15, \eta_p^2 = 0.45$ ), and a  
156 significant interaction between LOAD and ATTENTION ( $F(2, 114) = 26.40, p$   
157  $= 3.8e-10, \eta_p^2 = 0.32$ ).

158 Figure 2a displays the interaction. Under the load-4 condition, both  
159 endogenous and exogenous retro-cues facilitated VWM performance  
160 equivalently, compared to the no-cue condition (4\_endo vs. 4\_exo:  $t(57) = -0.38,$   
161  $p_{adj} = 0.71$ , Cohen's  $d = 0.05$ ; 4\_endo vs. 4\_neu:  $t(57) = -8.20, p_{adj} = 4.8e-11,$

162 Cohen's  $d=1.08$ ; 4\_exo vs. 4\_neu:  $t(57)=-8.59$ ,  $p_{adj}=2.2e-11$ , Cohen's  $d=1.13$ .  
163 Importantly, under the load-2 condition, exogenous cues were more effective  
164 than endogenous cues (2\_endo vs. 2\_exo:  $t(57)=2.64$ ,  $p_{adj}=0.017$ , Cohen's  
165  $d=0.35$ ; 2\_endo vs. 2\_neu:  $t(57)=-1.70$ ,  $p_{adj}=0.094$ , Cohen's  $d=0.22$ ; 2\_exo vs.  
166 2\_neu:  $t(57)=-5.82$ ,  $p_{adj}=8.5e-7$ , Cohen's  $d=0.76$ ).

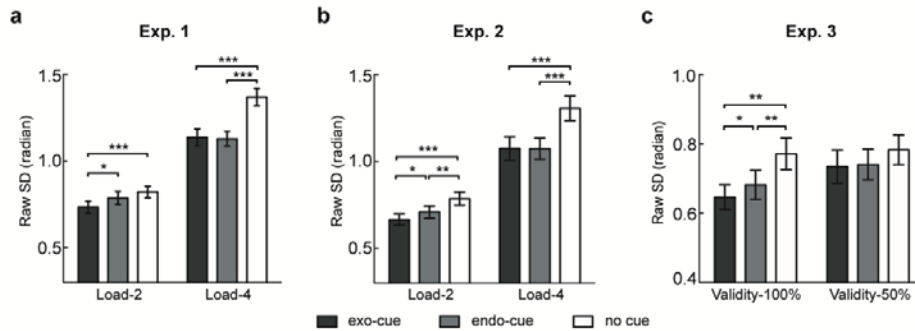

167

168 **Figure 2 | Behavioral results.** **a**, Behavioral results from experiment 1 ( $n=58$ ). **b**,  
169 Behavioral results from experiment 2 ( $n=19$ ). **c**, Behavioral results from experiment 3  
170 ( $n=24$ ). \*  $p < 0.05$ , \*\*  $p < 0.01$ , \*\*\*  $p < 0.001$ , all  $p$ -values are FDR corrected.

171

172 To focus on the attentional processes induced by the retro-cues, 2-by-2  
173 ANOVAs for the pupil diameters were performed at each time point. There  
174 existed significant main effects of LOAD starting from 284 ms after the sample  
175 stimuli until 376 ms after the cues ( $ps < 0.05$ ), significant main effects of  
176 ATTENTION (endogenous, exogenous) starting from 350 ms after the cues  
177 ( $ps < 0.05$ ), and significant interactions starting from 406 ms after the cues  
178 ( $ps < 0.05$ ). To further demonstrate this interaction, the sensory evoked activity  
179 could be subtracted between the two VWM loads within one attentional type.  
180 The difference between endogenous and exogenous attention was shown in  
181 Fig. 3b. Within the time window of post-cue 300-500ms, a larger pupillary  
182 dilation for exogenous attention was observed (endo (2-4) VS. exo (2-4):  
183  $t(57)=-2.29$ ,  $p=0.026$ , Cohen's  $d=0.30$ ).

184 The results remained largely unchanged when we dropped out the trials  
185 without perfect central fixations (see Methods, supplementary Fig. S1a and Fig.  
186 S2a-b). These findings suggested that exogenous attention would induce a  
187 higher level of alertness which was usually associated with larger pupil dilation.

188

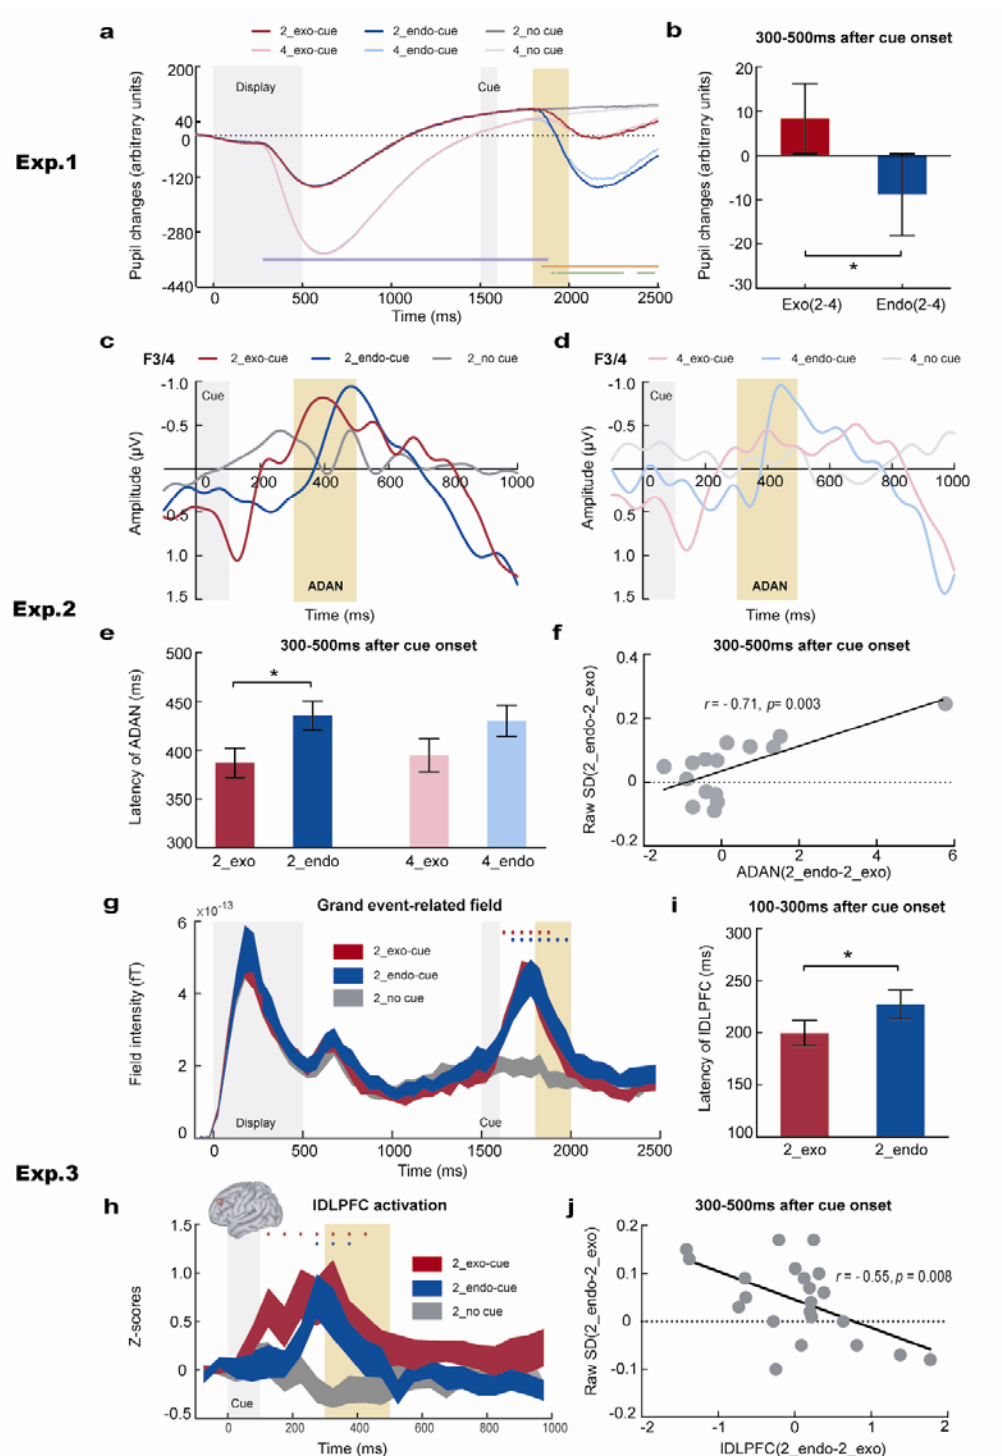

189

190 **Figure 3 | Psychophysiological results.** **a**, Pupil changes as a function of time referred  
 191 to the memory display. Purple dots indicate a main effect of LOAD, orange dots indicate a  
 192 main effect of ATTENTION, and green dots indicate a 2-by-2 interaction. **b**, Load-by-cue  
 193 interactions within the time window of 300-500 ms after the cue onset. **c-d**, The contra-  
 194 minus ipsilateral curves at frontal F3/4 electrodes time-locked to the retro-cue onset for the



195 load-2 (c) and load-4 condition (d). The yellow area indicates the time period of the ADAN  
196 component (300-500 ms after the cue onset). **e**, The latency of the ADAN component for  
197 retro-cue conditions. **f**, Correlations between ADAN and behavioral results under the  
198 load-2 condition (two-tailed *t*-tests,  $p < 0.05$ ). **g-h**, Grand event-related field time-locked to  
199 memory display (g) and the left DLPFC activation time-locked to the cue onset (h) in blocks  
200 with 100% validity. Red (blue) dots indicate higher brain responses to exogenous  
201 (endogenous) retro-cues than to no cue condition (one-tailed *t*-tests,  $p < 0.05$ ). Yellow areas  
202 indicate a time period of 300-500 ms after the cue onset. **i**, The latency of IDLPFC  
203 activation within the range of 100-300 ms after cue onset for retro-cue conditions. **j**,  
204 Correlations in blocks with 100% validity of activation differences between endogenous  
205 and exogenous cues at IDLPFC and their behavioral differences within a post-cue period  
206 of 300-500ms. \*  $p < 0.05$ .

207

208

## 209 Experiment 2

210 To further identify the neural dynamics underlying the behavioral  
211 distinction between effects of the two types of retro-cues, experiment 2 was  
212 performed by another group of 20 participants with EEG. The design was  
213 identical to that in experiment 1 with only one exception for the layout of Gabor  
214 patches, where under the load-2 condition, the Gabor patches were bilaterally  
215 presented on both hemispheres of the screen to balance the visual inputs. One  
216 participant was excluded from behavioral analysis due to poor performance  
217 (see the above criterion) and another 4 participants were excluded from EEG  
218 analysis due to excessive artifacts in EEG signals. Again, behavioral results  
219 demonstrated a significant main effect of LOAD ( $F(1, 18) = 116.31, p = 2.8e-9,$   
220  $\eta_p^2 = 0.87$ ), a significant main effect of ATTENTION ( $F(2, 36) = 43.27, p$   
221  $= 2.7e-10, \eta_p^2 = 0.71$ ), and a significant LOAD\*ATTENTION interaction ( $F(2, 36)$   
222  $= 7.10, p = 0.003, \eta_p^2 = 0.28$ ). Post hoc *t* tests further revealed an advantage of  
223 exogenous retro-cues only under the load-2 condition (Fig. 2b; 2\_endo vs.  
224 2\_exo:  $t(18) = 2.25, p_{adj} = 0.037$ , Cohen's  $d = 0.52$ ; 4\_endo vs. 4\_exo:  $t(18) = 0.06,$   
225  $p_{adj} = 0.952$ , Cohen's  $d = 0.01$ ), replicating the findings in experiment 1.  
226 Furthermore, such benefit of the exogenous cue was not due to the  
227 speed-accuracy trade-off effect, as no reaction time (RT) difference was

228 observed between the two types of retro-cues under any memory loads (see  
229 Supplementary Fig. S1b).

230 One lateralized event-related potential (ERP) component, an anterior  
231 directing attention negativity (ADAN, 300-500ms after cue onset) at frontal F3/4  
232 electrodes, which was tightly related to attentional orientation (Eimer, Velzen, &  
233 Driver, 2002; Göddertz, Klatt, Mertes, & Schneider, 2018; Myers et al., 2015),  
234 showed a shorter latency for exogenous retro-cues than that for endogenous  
235 retro-cues under the load-2 condition (Fig. 3c-e, see supplementary Fig. S2e-f  
236 for un-subtracted bilateral waves; 2\_endo vs. 2\_exo:  $t(14)=2.20$ ,  $p=0.045$ ,  
237 Cohen's  $d=0.57$ ; 4\_endo vs. 4\_exo:  $t(14)=1.50$ ,  $p=0.156$ , Cohen's  $d=0.387$ ).  
238 Interestingly, differences in ADAN amplitude were further positively correlated  
239 with differences between the two types of cues under the load-2 condition in  
240 Raw SD ( $r=0.71$ ,  $p=0.003$ ) (Fig. 3f). Although similar neural-behavioral  
241 correlations were found for the posterior contralateral negativity (PCN,  
242 supplementary Fig. S2), which is also associated with attentional orientation  
243 (Eimer et al., 2002; Göddertz et al., 2018; Heuer & Schubö, 2016; Luck &  
244 Hillyard, 1994; Myers et al., 2015), PCN failed to show the difference in latency  
245 between the two types of retro-cues.

246 In addition, lateralized early ERPs, such as P1pc and P1ac (100-160ms  
247 after the cue onset), were exclusively observed in exogenous retro-cue  
248 conditions under both memory loads (supplementary Fig. S2k and S2o),  
249 whereas the distractor positivity (Pd, another lateralized ERP, 580-680ms after  
250 cue onset), which has been linked to the inhibition of attentional shift  
251 (Schneider, Barth, Getzmann, & Wascher, 2017; Schneider, Mertes, &  
252 Wascher, 2016), was solely identified in endogenous retro-cue conditions  
253 (supplementary Fig. S2n).

254

### 255 Experiment 3

256 Although the EEG recording has the advantage of high temporal resolution,  
257 it still lacks of spatial resolution, and is not well-performed in source analysis,  
258 which could be remedied by MEG recording. Therefore, experiment 3 was  
259 performed by another group of 27 participants in a magnetoencephalography  
260 (MEG) scanner. As in the perceptual domain, when the cue validity drops to

261 50%, effects induced by endogenous cues diminish while effects induced by  
262 exogenous cues remain (Briand, 1998; Kingstone, Smilek, Ristic, Friesen, &  
263 Eastwood, 2003; Posner, 1978). To exclude cue validity as a potential factor  
264 that could influence endogenous vs. exogenous cues differently, we added a  
265 condition of cue validity with 50% in experiment 3. Meanwhile, in order to draw  
266 similar number of trials as in experiments 1 and 2, we focused on the load-2  
267 condition in which endogenous and exogenous cues induced behavioral  
268 difference in the above experiments. The cue validity was block-wise designed  
269 with 100% vs. 50%. The combination of retro-cue types (endogenous or  
270 exogenous cue) and cue validities (100% or 50%) was presented at separate  
271 blocks, randomly intermixed with no-cue trials (see Methods for details).

272 Two subjects were excluded due to poor performance. The behavioral  
273 results revealed a significant main effect of ATTENTION when cues were 100%  
274 valid ( $F(2, 46) = 12.24, p = 5.5e-5, \eta_p^2 = 0.35$ ). Post hoc *t* tests further showed  
275 that exogenous cues led to lower Raw SD compared to endogenous cues  
276 (endo vs. exo:  $t(23) = 2.20, p_{adj} = 0.038$ , Cohen's  $d = 0.45$ ), consistent with results  
277 in experiments 1 and 2. In contrast, non-significant effect of ATTENTION was  
278 observed when cues were 50% valid (Fig. 2c;  $F(2, 46) = 1.14, p = 0.329, \eta_p^2 =$   
279  $0.047$ ), although valid cues resulted in better performance than invalid cues  
280 (supplementary Fig.S1c; valid\_endo vs. invalid\_endo:  $t(23) = -2.58, p = 0.017$ ,  
281 Cohen's  $d = 0.53$ ; valid\_exo vs. invalid\_exo:  $t(23) = -3.46, p = 0.002$ , Cohen's  
282  $d = 0.71$ ). These results were different from the traditional findings in the  
283 perceptual domain, in which exogenous cues always attracted attention even  
284 when they were uninformative (Briand, 1998; Carrasco, 2011; Emmanuel  
285 Guzman, Marcia Grabowecky, German Palafox, 2012; Kingstone et al., 2003;  
286 Posner, 1978), suggesting that the differences between the two types of  
287 retro-cues in our study was not due to automatic attentional processing. Again,  
288 the control analysis on RTs in experiment 3 excluded the possibility of  
289 speed-accuracy trade-off (supplementary Fig. S1d). Taken together, there was  
290 a consistent behavioral difference between endogenous and exogenous  
291 retro-cues with 100% validity under the load-2 condition.

292 Another two subjects were excluded for MEG analysis due to large  
293 artifacts in MEG signals (see Methods for details). To assess brain areas that

294 might lead to behavioral changes, we estimated neural responses in the source  
295 space for each condition. Two clusters including the right intraparietal sulcus  
296 (IPS) and left DLPFC displayed significantly larger neural activation in both  
297 cued conditions vs. no-cue condition in the post-cue period of 0-500 ms  
298 (permutation test  $\alpha < 0.05$ ). During the post-cue period of 100-300ms,  
299 activations at the left DLPFC (IDLPC) showed a shorter latency for the  
300 exogenous cue than that for the endogenous cue (Fig. 3h-i; endo vs. exo:  
301  $t(21)=2.20$ ,  $p=0.040$ , Cohen's  $d=0.47$ ). Furthermore, during the post-cue period  
302 of 300-500ms which overlapping the time window of ADAN, differences in  
303 activation between endogenous and exogenous cues at the IDLPC were  
304 negatively correlated with their behavioral differences in Raw SD ( $r=-0.55$ ,  
305  $p=0.008$ ) (Fig. 3j). These findings, together with the ADAN in experiment 2 (Fig.  
306 3g), further suggested that although in the perception domain, exogenous cues  
307 were regarded as merely bottom-up manner (Buschman & Miller, 2007; Hahn  
308 et al., 2006; Theeuwes, 2010), they induced a faster and stronger IDLPC  
309 activation, which accounted for better performance than that induced by  
310 endogenous retro-cues. In addition, we found that activations at right IPS (rIPS)  
311 during the post-cue 100-300ms was marginally faster for exogenous than  
312 endogenous cues (supplementary Fig. S3a-b; endo vs. exo:  $t(21)=2.06$ ,  
313  $p=0.052$ , Cohen's  $d=0.44$ ), and could predict both retro-cue benefits in Raw SD  
314 (supplementary Fig. S3c-d; endo-neu:  $r=-0.55$ ,  $p=0.008$ ; exo-neu:  $r=-0.60$ ,  
315  $p=0.003$ ), suggesting shared neural mechanisms by the two types of retro-cues  
316 in the parietal cortex.

317 Indeed, the superior parietal lobe (SPL) vs. the inferior parietal lobe (IPL)  
318 have been regarded as critical regions in top-down vs. bottom-up  
319 attention-related processes (Ciaramelli, Grady, & Moscovitch, 2008; Corbetta,  
320 Kincade, & Shulman, 2002; Corbetta & Shulman, 2002). To understand how  
321 visual information was transferred across parietal and frontal regions and how  
322 such process was modulated by frontal activities relating to behavior, Granger  
323 causality analysis was performed to the source activity of SPL, IPL, DLPFC,  
324 and the lateral occipital cortex (LOC) (see Methods for details, supplementary  
325 Fig. S3e). Results revealed that both endogenous and exogenous cues  
326 induced a top-down control from DLPFC to LOC during 300-500ms after the

327 cue onset (Fig. 4a-b). The time window coincided with that of the  
328 frontal-behavioral correlation in experiment 3 (Fig. 3j), the pupil size difference  
329 in experiment 1 (Fig. 3b) and ADAN component in experiment 2 (Fig. 3f).  
330 Interestingly, such process exclusively took place as early as 200ms after the  
331 onset of an exogenous cue, consistent with the time window of IDLPFC  
332 activations in experiment 3 (Fig. 3h-i) and P1ac in experiment 2 (supplementary  
333 Fig. S2o). These findings further suggested that exogenous retro-cues induced  
334 early activation in the frontal-posterior network, which was quite different from  
335 the merely bottom-up processes induced by exogenous cues in perception  
336 (Buschman & Miller, 2007; Chica et al., 2013; Connor, Egeth, & Yantis, 2004;  
337 Dugué, Merriam, Heeger, & Carrasco, 2018; Eimer et al., 2002; Hickey, Van  
338 Zoest, & Theeuwes, 2010; Hopfinger & West, 2006; Theeuwes, 2010). For the  
339 no-cue condition, there was no information transfer between the frontal and  
340 occipital regions (Fig. 4c).

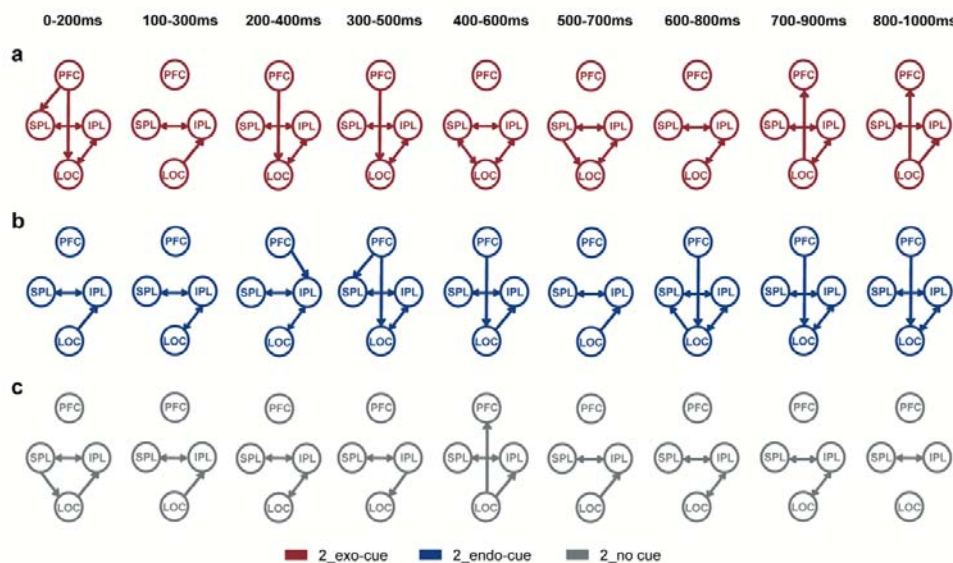

341

342 **Figure 4 | Granger causality analysis from experiment 3. a-b**, Neural dynamics for  
343 exogenous (a) or endogenous (b) retro-cue trials with 100% validity, time-locked to the cue  
344 onset. **c**, Neural dynamics for no-cue trials in blocks with 100% validity, time-locked to the  
345 middle of delay period. Each arrow indicates the direction of information flow after  
346 Bonferroni correction ( $p < 0.05$ ).

347

348 Experiment 4

349 Finally, we continued to identify the causal role of DLPFC and IPS in the  
350 retro-cue effects in experiment 4 with transcranial magnetic stimulation (TMS).  
351 A new group of 22 subjects were recruited. In each block, three types of cues  
352 were randomly mixed with equal number of trials. Stimulating sites were  
353 targeted at IDLPFC or rIPS, whose MNI coordinates were acquired as the  
354 maximal activation observed in experiment 3. Vertex served as a control  
355 stimulating site. To explore the time course of these brain regions in cognitive  
356 processes, a single pulse TMS was given at 100, 400, or 700ms after the cue  
357 onset (when no cue presented, we match the time points with the cued  
358 condition) in each trial. After considering the length of the experiment and  
359 maximum number of stimulating pulses in one session, we focused on the  
360 load-2 condition with 100% validity, in which all three experiments showed  
361 behavioral difference between endogenous and exogenous cues (see Methods  
362 for details).

363 Two subjects were excluded due to poor performance. When TMS was  
364 applied at vertex (Fig. 5a), there was a main effect of ATTENTION ( $F(2, 38) =$   
365  $18.11, p = 3.0e-6, \eta_p^2 = 0.49$ ). Post hoc  $t$ -tests replicated the findings in the prior  
366 three experiments, indicating a superiority effect of exogenous retro-cues  
367 (endo vs. exo:  $t(19) = 2.33; p_{adj} = 0.031$ ; Cohen's  $d = 0.52$ ). Interestingly, TMS  
368 over IDLPFC or rIPS both abolished the differences in Raw SD between the two  
369 types of retro-cues (IDLPFC:  $t(19) = -1.62, p_{adj} = 0.121$ , Cohen's  $d = 0.36$ ; rIPS:  
370  $t(19) = 0.963, p_{adj} = 0.348$ , Cohen's  $d = 0.22$ ).

371 However, further looking at TMS results at different time points, they  
372 further suggested the timing of IDLPFC/rIPS function. When TMS was  
373 delivered at 100ms after the exogenous cue onset, the retro-cue benefit in Raw  
374 SD diminished (Fig. 5b; IDLPFC\_100ms vs. vertex:  $t(19) = 2.80, p = 0.012$ ,  
375 Cohen's  $d = 0.62$ ). The control analysis on endogenous retro-cue effects at any  
376 stimulating time points did not replicate such results, neither did rIPS-targeted  
377 TMS at both types of retro-cues (Fig. 5b-c). These findings strongly proved that  
378 IDLPFC (but not rIPS) causally affected exogenous (but not endogenous)  
379 attentional processing within a time window of 100ms.



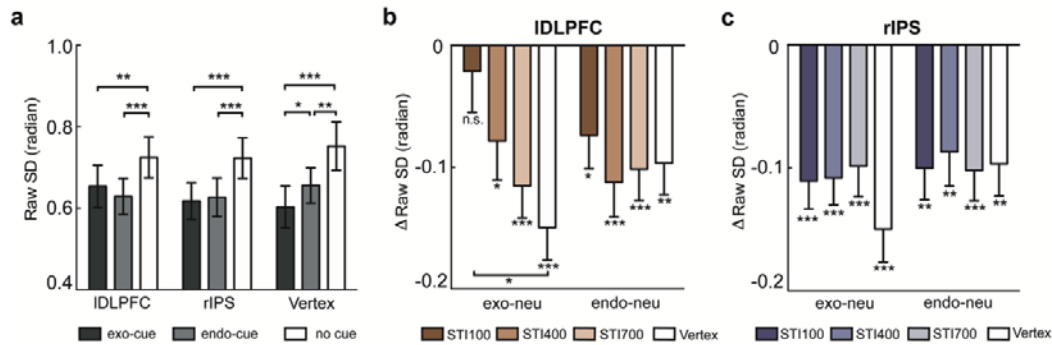

380

381 **Figure 5 | TMS results from experiment 4 (n=20).** **a**, Merged data when TMS was set to  
 382 LPFC, RIPS and vertex, respectively. **b-c**, Retro-cue effects when IDLPFC-targeted (**b**) or  
 383 rIPS-targeted (**c**) TMS was delivered at 100ms, 400ms, and 700ms after the cue onset.  
 384 'exo' stands for exogenous cue, 'endo' stands for endogenous cue, and 'neu' stands for no  
 385 cue condition. \*  $p < 0.05$ , \*\*  $p < 0.01$ , \*\*\*  $p < 0.001$ , all  $p$ -values are FDR corrected.

386

## 387 DISCUSSION

388 Consistent with previous findings using retro-cues under the VWM load-4  
 389 condition (Kuo, Stokes, & Nobre, 2012; Murray et al., 2013; Pertzov et al., 2013;  
 390 Pertzov, Manohar, & Husain, 2017; Shimi et al., 2014; Astle, Summerfield,  
 391 Griffin, & Nobre, 2012; Gözenman, Tanoue, Metoyer, & Berryhill, 2014; Gunseli,  
 392 van Moorselaar, Meeter, & Olivers, 2015; Lepsien & Nobre, 2006; Griffin &  
 393 Nobre, 2003; Tanoue & Berryhill, 2012), we observed equivalent behavioral  
 394 benefit for both exogenous and endogenous cues, confirming the important  
 395 roles of spatial attention in modulating working memory representations. More  
 396 importantly, we discovered a reliable difference in behavior between the two  
 397 attentional effects under the low (but not high) VWM load through four  
 398 experiments with 133 participants, which was not investigated in the previous  
 399 studies (Kuo et al., 2012; Murray et al., 2013; Pertzov et al., 2013, 2017; Shimi  
 400 et al., 2014; Astle, Summerfield, Griffin, & Nobre, 2012; Brady & Hampton,  
 401 2018; Gözenman, Tanoue, Metoyer, & Berryhill, 2014; Gunseli, van Moorselaar,  
 402 Meeter, & Olivers, 2015; Lepsien & Nobre, 2006; Williams, Hong, Kang,  
 403 Carlisle, & Woodman, 2013; Griffin & Nobre, 2003; Matsukura, Cosman, Roper,  
 404 Vatterott, & Vecera, 2014; Tanoue & Berryhill, 2012). Combining multimodal  
 405 neurophysiological recordings with eye-tracking, EEG, MEG and TMS, we

406 further revealed convergent evidence for physiological and neural differences  
407 between the two attentional processes under the low VWM load.

408 Specifically, compared to endogenous cues, exogenous cues led to  
409 shorter latency of frontal ERP component (i.e. ADAN) indicating faster  
410 attentional deployment (experiment 2), and earlier DLPFC activity that were  
411 normally regarded as high-level processes of cognitive functions (experiment  
412 3). Importantly, both amplitude of ADAN (experiment 2) and activity in IDLPFC  
413 (experiment 3) from 300ms to 500ms after the retro-cue onset explained the  
414 behavioral difference between the two types of cues.

415 How does such faster frontal activity in exogenous attention than  
416 endogenous attention come out and lead to better performance? Our data  
417 demonstrate one possibility. In experiment 2, there existed early contralateral  
418 ERP component (i.e. P1ac and P1pc) between 100-200ms after the exogenous  
419 cue, indicating fast automatic attentional processes, which however, did not  
420 exist in the endogenous condition. Such time window coincided with the time  
421 window in experiment 3 when the exogenous cues induced earlier DLPFC and  
422 IPS activity. Interestingly, the pupil dilation, which was tightly connected to the  
423 arousal systems (Alnæs et al., 2014; Granholm & Steinhauer, 2004; Nassar et  
424 al., 2012), appeared stronger for the exogenous cues than the endogenous  
425 cues at a similar latency of around 400ms (experiment 1). The overlapped time  
426 window of 300-500ms might indicate interactions between the alerting and  
427 orienting attention networks (Fan et al., 2005; Gazzaley & Nobre, 2012). To  
428 sum up, through the fast-automatic bottom-up processing, exogenous cues  
429 recruit early top-down control from DLPFC, and induce earlier frontal activities,  
430 which further interact with the arousal system that may amplify the processes.  
431 Such frontal activity induced by the exogenous cue is the real reason for the  
432 larger behavioral benefit than the endogenous cue.

433 However, it should be noted that both DLPFC and IPS demonstrate earlier  
434 activity in exogenous condition (experiment 3), and both the frontal ADAN and  
435 the parietal PCN could explain the behavioral difference between the two  
436 attentional types (experiment 2). Meanwhile, there are lots of evidence that  
437 prefrontal cortical areas receive bottom-up projection from parietal and occipital  
438 areas (Bressler, Tang, Sylvester, Shulman, & Corbetta, 2008; Connor et al.,



439 2004; Theeuwes, 2010). Then which activity is more critical, the frontal or the  
440 parietal? In the current task-set, we suggested the more important role in the  
441 frontal top-down modulation, as TMS over DLPFC abolished the exogenous  
442 superiority but TMS over IPS did not (experiment 4). Nevertheless, it should be  
443 acknowledged that there might be other parietal areas that contribute to these  
444 processes as we only tested IPS in the present study.

445       Alternative explanations may exist for such top-down signal from DLPFC.  
446 For example, DLPFC has been suggested to maintain VWM representations in  
447 a plethora of studies (Barbey, Koenigs, & Grafman, 2013; Curtis & D'Esposito,  
448 2003; S. Funahashi, Bruce, & Goldman-Rakic, 1989; Shintaro Funahashi,  
449 Chafee, & Goldman-Rakic, 1993; Shintaro Funahashi, Takeda, & Watanabe,  
450 2004; Fuster, 1971). Recent studies reveal that the representations maintained  
451 in DLPFC neurons could be flexibly switched during the delay (Spaak,  
452 Watanabe, Funahashi, & Stokes, 2017; Stokes et al., 2013). Therefore, the  
453 top-down signal observed from the present study could also be representations  
454 stored in DLPFC and exogenous cues lead to faster shift of tuning of the  
455 representations (Spaak et al., 2017; Stokes et al., 2013). Indeed, dynamic  
456 coding in the prefrontal cortex has recently been regarded as the format of  
457 VWM storage (Meyers, 2018; Stokes, 2015), in contrast to the traditional view  
458 of static sustained activity (Goldman-Rakic, 1995). Our data put another  
459 possibility that attentional processes might also play a role in such dynamic  
460 shifting of representations.

461       Moreover, our data could unify attentional processes in the perceptual  
462 domain and those in the memory domain on the one side. In the current study,  
463 inspired by findings from the perceptual domain that the exogenous and  
464 endogenous attention effects tend to differentiate when sensory signal-to-noise  
465 ratio is high (Lu & Doshier, 1998, 2000; Lu, Lesmes, & Doshier, 2002), we  
466 employ a low load condition in which memory signal-to-noise ratio is high, as  
467 well as more sensitive measures with the memory recall task compared to the  
468 prior change detection task. Interestingly, we consistently find behavioral  
469 difference between exogenous and endogenous cues in four experiments. In  
470 such a way, the attentional effects in the perception domain and the memory  
471 domain can be incorporated by the same criteria of signal-to-noise ratio:

472 endogenous and exogenous cues are equivalent when the signal-to-noise ratio  
473 is low; they tend to differentiate when the signal-to-noise ratio is high. However,  
474 future studies are needed to quantify the boundary of signal-to-noise ratio  
475 leading to the difference.

476         Meanwhile, at the neural level, contralateral ERP components indicating  
477 the attentional shift, such as ADAN and PCN, were identified for both endo- and  
478 exogenous retro-cues in the current study (experiment 2). Similar results were  
479 found in those EEG studies using spatial pre-cues (Eimer et al., 2002; Heuer &  
480 Schubö, 2016; Hickey, Lollo, & McDonald, 2009; Luck & Hillyard, 1994). Both  
481 endogenous and exogenous cues activated a large network involving parietal,  
482 frontal and visual cortices (experiment 3), overlapping the areas in fMRI studies  
483 using the pre-cues (Corbetta, Kincade, Ollinger, Mcavoy, & Gordon, 2000;  
484 Lepsien & Nobre, 2006; Mao, Zhou, Zhou, & Han, 2006; Rosen et al., 1992;  
485 Vandenberghe, Gitelman, Parrish, & Mesulam, 2001; Yantis et al., 2002;  
486 Dugué et al., 2018). These findings altogether indicated that spatial orienting in  
487 both the perceptual and VWM domain shared some common neural  
488 substrates.

489         On the other side, however, the attentional processes in perception or  
490 memory can be fairly different. Traditionally, exogenous attentional processes  
491 in perception were regarded as a merely bottom-up manner (Buschman &  
492 Miller, 2007; Chica et al., 2013; Connor et al., 2004; Dugué et al., 2018; Eimer  
493 et al., 2002; Hickey et al., 2010; Hopfinger & West, 2006; Theeuwes, 2010).  
494 However, in the present study, Granger causality analysis with source activity  
495 in MEG suggested a top-down signal from the prefrontal cortex as early as  
496 100ms after the exogenous cue (experiment 3), and single pulse TMS over  
497 IDLPFC at the same 100ms post-cue time indeed abolished the exogenous  
498 retro-cue effects (experiment 4). These results indicated that 1) exogenous  
499 attention processes in memory were not only bottom-up; 2) the early top-down  
500 influence from the prefrontal cortex was critical for the superiority of exogenous  
501 attentional effects.

502         Besides the early top-down signal distinguishing exogenous attention  
503 processes in the memory domain from those in the perceptual domain, there  
504 still existed other differences between the attentional processes in the two

505 domains, based on our results. For example, exogenous cues behaved  
506 differently in the present study from that in the perceptual domain when the cue  
507 validity was 50%. Previous studies suggested that in the perceptual domain  
508 exogenous cues always attracted attention in the condition with 50% validity  
509 while endogenous cues did not (Briand, 1998; Kingstone et al., 2003; Posner,  
510 1978). However, in the current results, both of their retro-cue benefits had gone  
511 when the cues were 50% valid, although differences between valid and invalid  
512 trials still existed. Altogether, at least we could say the attentional processes in  
513 memory vs. perception are similar but not the same, and the endogenous vs.  
514 exogenous attention processes in memory are different from the traditional  
515 top-down vs. bottom-up dissection in perception.

516 As predicted from the perceptual domain, the presence of superiority of  
517 exogenous cues towards VWM representations may be generalized to long  
518 term memory (LTM). It is of great interest to further demonstrate the two  
519 different types of attention effects on LTM at different signal-to-noise ratio of  
520 memory trace. Such findings may also facilitate the educational implications  
521 that when the task is easier and memory signal is strong, exogenous cues  
522 might be more efficient than endogenous cues.

523 Although we combined different research modalities to form convergent  
524 evidence to strengthen, and further to explain the superiority of exogenous  
525 attention on VWM when the memory load was low, there still remained  
526 questions to be resolved. For example, after the exogenous cue presents, how  
527 is the cue processed in sensory cortices and then conveyed to the prefrontal  
528 cortex to trigger the top-down control signal? Or it may be conveyed directly  
529 from subcortical areas such as the superior colliculus or pulvinar, given such a  
530 fast time scale. To addressing these questions may require invasive  
531 neurophysiological studies, combining with computational models. We look  
532 forward to future studies using these tools to fully understand the interaction  
533 between attention and VWM, both lies in the center of human cognition.

534

535 REFERENCES

- 536 Adam, K. C. S., Vogel, E. K., & Awh, E. (2017). Clear evidence for item limits in visual working  
537 memory. *Cognitive Psychology*, *97*, 79–97.  
538 <https://doi.org/doi.org/10.1016/j.cogpsych.2017.07.001>
- 539 Alnæs, D., Sneve, M. H., Espeseth, T., Endestad, T., van de Pavert, S. H. P., & Laeng, B.  
540 (2014). Pupil size signals mental effort deployed during multiple object tracking and  
541 predicts brain activity in the dorsal attention network and the locus coeruleus. *Journal of*  
542 *Vision*, *14*(4), 1–20. <https://doi.org/doi:10.1167/14.4.1>
- 543 Astle, D. E., Summerfield, J., Griffin, I., & Nobre, A. C. (2012). Orienting attention to locations in  
544 mental representations. *Attention, Perception, & Psychophysics*, *74*(1), 146–162.  
545 <https://doi.org/doi.org/10.3758/s13414-011-0218-3>
- 546 Awh, E., & Jonides, J. (2001). Overlapping mechanisms of attention and spatial working  
547 memory. *Trends in Cognitive Sciences*, *5*(3), 119–126.  
548 [https://doi.org/10.1016/S1364-6613\(00\)01593-X](https://doi.org/10.1016/S1364-6613(00)01593-X)
- 549 Baddeley, A. (1986). *Working memory*. Oxford: Oxford University Press.
- 550 Barbey, A. K., Koenigs, M., & Grafman, J. (2013). Dorsolateral prefrontal contributions to  
551 human working memory. *Cortex*, *49*(5), 1195–1205.  
552 <https://doi.org/10.1016/j.cortex.2012.05.022>
- 553 Barnett, L., & Seth, A. K. (2014). The MVGC multivariate Granger causality toolbox: a new  
554 approach to Granger-causal inference. *Journal of Neuroscience Methods*, *223*(15), 50–68.  
555 <https://doi.org/doi.org/10.1016/j.jneumeth.2013.10.018>
- 556 Berens, P. (2009). CircStat: A MATLAB Toolbox for Circular Statistics. *Journal of Statistical*  
557 *Software*, *31*(10), 34019. <https://doi.org/10.18637/jss.v031.i10>
- 558 Brady, R. J., & Hampton, R. R. (2018). Post-encoding control of working memory enhances  
559 processing of relevant information in rhesus monkeys (*Macaca mulatta*). *Cognition*, *175*,  
560 26–35. <https://doi.org/10.1016/j.cognition.2018.02.012>
- 561 Bressler, S. L., Tang, W., Sylvester, C. M., Shulman, G. L., & Corbetta, M. (2008). Top-Down  
562 Control of Human Visual Cortex by Frontal and Parietal Cortex in Anticipatory Visual  
563 Spatial Attention. *Journal of Neuroscience*, *28*(40), 10056–10061.  
564 <https://doi.org/10.1523/JNEUROSCI.1776-08.2008>
- 565 Briand, K. A. (1998). Feature Integration and Spatial Attention: More Evidence of a Dissociation  
566 between Endogenous and Exogenous Orienting. *Journal of Experimental Psychology*  
567 *Human Perception & Performance*, *24*(4), 1243–1256.  
568 <https://doi.org/10.1037/0096-1523.24.4.1243>

- 569 Buschman, T. J., & Miller, E. K. (2007). Top-down versus bottom-up control of attention in the  
570 prefrontal and posterior parietal cortices. *Science*, *315*(5820), 1860–1864.  
571 <https://doi.org/10.1126/science.1138071>
- 572 Busse, L., Katzner, S., & Treue, S. (2008). Temporal dynamics of neuronal modulation during  
573 exogenous and endogenous shifts of visual attention in macaque area MT. *Proceedings*  
574 *of the National Academy of Sciences*, *105*(42), 16380–16385.  
575 <https://doi.org/10.1073/pnas.0707369105>
- 576 Carrasco, M. (2011). Visual attention: the past 25 years. *Vision Research*, *51*(13), 1484–1525.  
577 <https://doi.org/10.1016/j.visres.2011.04.012>
- 578 Chica, A. B., Bartolomeo, P., & Lupiáñez, J. (2013). Two cognitive and neural systems for  
579 endogenous and exogenous spatial attention. *Behavioural Brain Research*, *237*(1),  
580 107–123. <https://doi.org/10.1016/j.bbr.2012.09.027>
- 581 Ciaramelli, E., Grady, C. L., & Moscovitch, M. (2008). Top-down and bottom-up attention to  
582 memory: a hypothesis (AtoM) on the role of the posterior parietal cortex in memory  
583 retrieval. *Neuropsychologia*, *46*(7), 1828–1851.  
584 <https://doi.org/10.1016/j.neuropsychologia.2008.03.022>
- 585 Connor, C. E., Egeth, H. E., & Yantis, S. (2004). Visual attention: Bottom-up versus top-down.  
586 *Current Biology*, *14*(19), 850–852. <https://doi.org/10.1016/j.cub.2004.09.041>
- 587 Corbetta, M., Kincade, J. M., Ollinger, J. M., Mcavoy, M. P., & Gordon, L. (2000). Voluntary  
588 orienting is dissociated from target detection in human posterior parietal cortex. *Nature*  
589 *Neuroscience*, *3*(6), 292–297. <https://doi.org/10.1038/73009>
- 590 Corbetta, M., Kincade, J. M., & Shulman, G. L. (2002). Neural systems for visual orienting and  
591 their relationships to spatial working memory. *Journal of Cognitive Neuroscience*, *14*(3),  
592 508–523. <https://doi.org/10.1162/089892902317362029>
- 593 Corbetta, M., & Shulman, G. L. (2002). Control of Goal-Directed and Stimulus-Driven Attention  
594 in the Brain. *Nature Reviews Neuroscience*, *3*(3), 201–215.  
595 <https://doi.org/10.1038/nrn755>
- 596 Cowan, N. (2001). The magical number 4 in short-term memory: A reconsideration of mental  
597 storage capacity. *Behavioral and Brain Sciences*, *24*(1), 87–114.  
598 <https://doi.org/10.1017/s0140525x01003922>
- 599 Cowan, N. (2017). The many faces of working memory and short-term storage. *Psychonomic*  
600 *Bulletin and Review*, *24*(4), 1158–1170. <https://doi.org/10.3758/s13423-016-1191-6>

- 601 Curtis, C. E., & D'Esposito, M. (2003). Persistent activity in the prefrontal cortex during working  
602 memory. *Trends in Cognitive Sciences*, 7(9), 415–423.  
603 [https://doi.org/10.1016/S1364-6613\(03\)00197-9](https://doi.org/10.1016/S1364-6613(03)00197-9)
- 604 Delorme, A., & Makeig, S. (2004). EEGLAB: an open source toolbox for analysis of single-trial  
605 EEG dynamics including independent component analysis. *Journal of Neuroscience*  
606 *Methods*, 134(1), 9–21. <https://doi.org/10.1016/j.jneumeth.2003.10.009>
- 607 Desikan, R. S., Ségonne, F., Fischl, B., Quinn, B. T., Dickerson, B. C., Blacker, D., ... Hyman, B.  
608 T. (2006). An automated labeling system for subdividing the human cerebral cortex on  
609 MRI scans into gyral based regions of interest. *NeuroImage*, 31(3), 968–980.  
610 <https://doi.org/10.1016/j.neuroimage.2006.01.021>
- 611 Dugué, L., Merriam, E. P., Heeger, D. J., & Carrasco, M. (2018). Endogenous and exogenous  
612 attention distinctly modulate fMRI activity in visual cortex. *BioRxiv*, 1–28.  
613 <https://doi.org/10.1101/414508>
- 614 Eimer, M., Velzen, J. van, & Driver, J. (2002). Cross-Modal Interactions between Audition,  
615 Touch, and Vision in Endogenous Spatial Attention: ERP Evidence on Preparatory States  
616 and Sensory Modulations. *Journal of Cognitive Neuroscience*, 14(2), 254–271.  
617 <https://doi.org/10.1162/089892902317236885>
- 618 Emmanuel Guzman, Marcia Grabowecy, German Palafox, S. S. (2011). A unique role of  
619 endogenous visual-spatial attention in rapid processing of multiple targets. *Journal of*  
620 *Experimental Psychology: Human Perception and Performance*, 37(4), 1065–1073.  
621 <https://doi.org/10.1037/a0023514>
- 622 Engle, R., Kane, M., & W Tuholski, S. (1999). Individual differences in working memory  
623 capacity and what they tell us about controlled attention, general fluid intelligence, and  
624 functions of the prefrontal cortex. In *Models of Working Memory: Mechanisms of Active*  
625 *Maintenance and Executive Control* (pp. 102–134). Cambridge: Cambridge University  
626 Press. <https://doi.org/10.1017/CBO9781139174909.007>
- 627 Fan, J., McCandliss, B. D., Fossella, J., Flombaum, J. I., & Posner, M. I. (2005). The activation  
628 of attentional networks. *NeuroImage*, 26(2), 471–479.  
629 <https://doi.org/10.1016/j.neuroimage.2005.02.004>
- 630 Funahashi, S., Bruce, C. J., & Goldman-Rakic, P. S. (1989). Mnemonic Coding of Visual Space  
631 in the Monkey ' s Dorsolateral Prefrontal Cortex. *Journal of Neurophysiology*, 61(2),  
632 331–349. <https://doi.org/10.1152/jn.1989.61.2.331>



- 633 Funahashi, Shintaro, Chafee, M. V., & Goldman-Rakic, P. S. (1993). Prefrontal neuronal activity  
634 in rhesus monkeys performing a delayed anti-saccade task. *Nature*, *365*(6448), 753–756.  
635 <https://doi.org/10.1038/365753a0>
- 636 Funahashi, Shintaro, Takeda, K., & Watanabe, Y. (2004). Neural mechanisms of spatial  
637 working memory □: Contributions of the dorsolateral prefrontal cortex and the thalamic  
638 mediodorsal nucleus. *Cognitive, Affective, & Behavioral Neuroscience*, *4*(4), 409–420.  
639 <https://doi.org/10.3758/CABN.4.4.409>
- 640 Fuster, J. M. (1971). Neuron Activity Related to Short-Term Memory. *Science*, *173*(3997),  
641 652–654. <https://doi.org/10.1126/science.173.3997.652>
- 642 Gazzaley, A., & Nobre, A. C. (2012). The Attention System of the Human Brain: 20 Years After.  
643 *Annual Review of Neuroscience*, *21*(35), 73–89.  
644 <https://doi.org/10.1146/annurev-neuro-062111-150525>.The
- 645 Göddertz, A., Klatt, L.-I., Mertes, C., & Schneider, D. (2018). Retroactive attentional shifts  
646 predict performance in a working memory task: Evidence by lateralized EEG patterns.  
647 *Frontiers in Human Neuroscience*, *12*, 428. <https://doi.org/10.3389/fnhum.2018.00428>
- 648 Goldman-Rakic, P. S. (1995). Cellular basis of working memory. *Neuron*, *14*(3), 477–485.  
649 [https://doi.org/https://doi.org/10.1016/0896-6273\(95\)90304-6](https://doi.org/https://doi.org/10.1016/0896-6273(95)90304-6)
- 650 Gözenman, F., Tanoue, R. T., Metoyer, T., & Berryhill, M. E. (2014). Invalid retro-cues can  
651 eliminate the retro-cue benefit: Evidence for a hybridized account. *Journal of*  
652 *Experimental Psychology □: Human Perception and Performance*, *40*(5), 1748–1754.  
653 <https://doi.org/10.1037/a0037474>
- 654 Granholm, E., & Steinhauer, S. R. (2004). Pupillometric measures of cognitive and emotional  
655 processes. *International Journal of Psychophysiology*, *52*(1), 1–6.  
656 <https://doi.org/10.1016/j.ijpsycho.2003.12.001>
- 657 Griffin, I. C., & Nobre, A. C. (2003). Orienting attention to locations in internal representations.  
658 *Journal of Cognitive Neuroscience*, *15*(8), 1176–1194.  
659 <https://doi.org/10.1162/089892903322598139>
- 660 Griffin, I. C., & Nobre, A. C. (2012). Orienting attention to locations in internal representations.  
661 *Journal of Cognitive Neuroscience*, *15*(8), 1176–1194.  
662 <https://doi.org/10.1162/089892903322598139>
- 663 Günseli, E., van Moorselaar, D., Meeter, M., & Olivers, C. N. L. (2015). The reliability of  
664 retro-cues determines the fate of noncued visual working memory representations.

- 665        *Psychonomic Bulletin & Review*, 22(5), 1334–1341.  
666        <https://doi.org/10.3758/s13423-014-0796-x>
- 667        Hahn, B., Ross, T. J., & Stein, E. A. (2006). Neuroanatomical dissociation between bottom–up  
668        and top–down processes of visuospatial selective attention. *NeuroImage*, 32(2), 842–853.  
669        <https://doi.org/10.1016/j.neuroimage.2006.04.177>
- 670        Heuer, A., & Schubö, A. (2016). The focus of attention in visual working memory: Protection of  
671        focused representations and its individual variation. *PLoS ONE*, 11(4), e0154228.  
672        <https://doi.org/10.1371/journal.pone.0154228>
- 673        Hickey, C., Lollo, V. Di, & McDonald, J. J. (2009). Electrophysiological Indices of Target and  
674        Distractor Processing in Visual Search. *Journal of Cognitive Neuroscience*, 21(4),  
675        760–775. <https://doi.org/10.1162/jocn.2009.21039>
- 676        Hickey, C., Van Zoest, W., & Theeuwes, J. (2010). The time course of exogenous and  
677        endogenous control of covert attention. *Experimental Brain Research*, 201(4), 789–796.  
678        <https://doi.org/10.1007/s00221-009-2094-9>
- 679        Hopfinger, J. B., & West, V. M. (2006). Interactions between endogenous and exogenous  
680        attention on cortical visual processing. *NeuroImage*, 31(2), 774–789.  
681        <https://doi.org/10.1016/j.neuroimage.2005.12.049>
- 682        James, W., Burkhardt, F., Bowers, F., & Skrupskelis, I. K. (1890). *The principles of psychology*  
683        (Vol. 1). Macmillan London.
- 684        Johnston, W. A., & Dark, V. J. (1986). Selective attention. *Annual Review of Psychology*, 37,  
685        43–75. <https://doi.org/10.1146/annurev.ps.37.020186.000355>
- 686        Kingstone, A., Smilek, D., Ristic, J., Friesen, C. K., & Eastwood, J. D. (2003). Attention,  
687        Researchers! It Is Time to Take a Look at the Real World. *Current Directions in*  
688        *Psychological Science*, 12(5), 176–180. <https://doi.org/10.1111/1467-8721.01255>
- 689        Kuo, B. C., Stokes, M. G., & Nobre, A. C. (2012). Attention modulates maintenance of  
690        representations in visual short-term memory. *Journal of Cognitive Neuroscience*, 24(1),  
691        51–60. [https://doi.org/10.1162/jocn\\_a\\_00087](https://doi.org/10.1162/jocn_a_00087)
- 692        Lepsien, J., & Nobre, A. C. (2006). Cognitive control of attention in the human brain: Insights  
693        from orienting attention to mental representations. *Brain Research*, 1105(1), 20–31.  
694        <https://doi.org/10.1016/j.brainres.2006.03.033>
- 695        Liu, T., Stevens, S. T., & Carrasco, M. (2007). Comparing the time course and efficacy of  
696        spatial and feature-based attention. *Vision Research*, 47(1), 108–113.  
697        <https://doi.org/10.1016/j.visres.2006.09.017>



- 698 Lu, Z.-L., & Doshier, B. A. (1998). External noise distinguishes mechanisms of attention. *Vision*  
699 *Research*, 38(9), 1183–1198. <https://doi.org/10.1016/B978-012375731-9/50078-1>
- 700 Lu, Z.-L., & Doshier, B. A. (2000). Spatial attention: Different mechanisms for central and  
701 peripheral temporal precues? *Journal of Experimental Psychology: Human Perception*  
702 *and Performance*, 26(5), 1534–1548. <https://doi.org/10.1037/0096-1523.26.5.1534>
- 703 Lu, Z.-L., Lesmes, L. A., & Doshier, B. A. (2002). Spatial attention excludes external noise at the  
704 target location. *Journal of Vision*, 2, 312–323. <https://doi.org/10.1167/2.4.4>
- 705 Luck, S. J., & Hillyard, S. (1994). Electrophysiological correlates of feature analysis during  
706 visual search. *Psychophysiology*, 31, 291–308.  
707 <https://doi.org/10.1111/j.1469-8986.1994.tb02218.x>
- 708 Ma, W. J., Husain, M., & Bays, P. M. (2014). Changing concepts of working memory. *Nature*  
709 *Neuroscience*, 17(3), 347–356. <https://doi.org/10.1038/nn.3655>
- 710 Mao, L., Zhou, B., Zhou, W., & Han, S. (2006). Neural correlates of covert orienting of visual  
711 spatial attention along vertical and horizontal dimensions. *Brain Research*, 1136,  
712 142–153. <https://doi.org/10.1016/j.brainres.2006.12.031>
- 713 Matsukura, M., Cosman, J. D., Roper, Z. J., Vatterott, D. B., & Vecera, S. P. (2014).  
714 Location-specific effects of attention during visual short-term memory maintenance.  
715 *Journal of Experimental Psychology: Human Perception and Performance*, 40(3),  
716 1103–1116. <https://doi.org/10.1037/a0035685>
- 717 Meyers, X. E. M. (2018). Working Memory □: Neural Mechanisms Dynamic population coding  
718 and its relationship to working memory. *Journal of Neurophysiology*, 120, 2260–2268.  
719 <https://doi.org/10.1152/jn.00225.2018>
- 720 Miller, G. A. (1956). The Magical Number Seven , Plus or Minus Two Some Limits on Our  
721 Capacity for Processing Information. *Psychological Review*, 63(2), 81–97.  
722 <https://doi.org/10.1037/h0043158>
- 723 Murray, A. M., Nobre, A. C., Clark, I. A., Cravo, A. M., & Stokes, M. G. (2013). Attention  
724 Restores Discrete Items to Visual Short-Term Memory. *Psychological Science*, 24(4),  
725 550–556. <https://doi.org/10.1177/0956797612457782>
- 726 Myers, N. E., Walther, L., Wallis, G., Stokes, M. G., & Nobre, A. C. (2015). Temporal dynamics  
727 of attention during encoding versus maintenance of working memory: complementary  
728 views from event-related potentials and alpha-band oscillations. *Journal of Cognitive*  
729 *Neuroscience*, 27(3), 492–508. [https://doi.org/10.1162/jocn\\_a\\_00727](https://doi.org/10.1162/jocn_a_00727)

- 730 Nassar, M. R., Rumsey, K. M., Wilson, R. C., Parikh, K., Heasly, B., & Gold, J. I. (2012).  
731 Rational regulation of learning dynamics by pupil-linked arousal systems. *Nature*  
732 *Neuroscience*, 15(7), 1040–1046. <https://doi.org/10.1038/nn.3130>
- 733 Pertzov, Y., Bays, P. M., Joseph, S., & Husain, M. (2013). Rapid forgetting prevented by  
734 retrospective attention cues. *Journal of Experimental Psychology: Human Perception and*  
735 *Performance*, 39(5), 1224–1231. <https://doi.org/10.1037/a0030947>
- 736 Pertzov, Y., Manohar, S., & Husain, M. (2017). Rapid Forgetting Results From Competition  
737 Over Time Between Items in Visual Working Memory. *Journal of Experimental*  
738 *Psychology: Learning, Memory, and Cognition*, 43(4), 528–536.  
739 <https://doi.org/10.1037/xlm0000328>
- 740 Pivik, R. T., Broughton, R. J., Coppola, R., Davidson, R. J., Fox, N., & Nuwer, M. R. (1993).  
741 Guidelines for the recording and quantitative analysis of electroencephalographic activity  
742 in research contexts. *Psychophysiology*, 30(6), 547–558.  
743 <https://doi.org/10.1111/j.1469-8986.1993.tb02081.x>
- 744 Posner, M. I. (1980). Orienting of attention. *The Quarterly Journal of Experimental Psychology*,  
745 32(1), 3–25. Retrieved from <http://www.ncbi.nlm.nih.gov/pubmed/7367577>
- 746 Posner, Michael I. (1978). *Chronometric explorations of mind*. Oxford, England: Lawrence  
747 Erlbaum.
- 748 Remington, R. W., Johnston, J. C., & Yantis, S. (1992). Involuntary attentional capture by  
749 abrupt onsets. *Perception & Psychophysics*, 51(3), 279–290.  
750 <https://doi.org/10.3758/BF03212254>
- 751 Reuter, M., Schmansky, N. J., Rosas, H. D., & Fischl, B. (2012). Within-subject template  
752 estimation for unbiased longitudinal image analysis. *NeuroImage*, 61(4), 1402–1418.  
753 <https://doi.org/10.1016/j.neuroimage.2012.02.084>
- 754 Rosen, A. C., Rao, S. M., Caffarra, P., Scaglioni, A., Bobholz, J. A., Woodley, S. J., ... Binder, J.  
755 R. (1999). Neural Basis of Endogenous and Exogenous Spatial Orienting: A Functional  
756 MRI Study. *Journal of Cognitive Neuroscience*, 11(2), 135–152.  
757 <https://doi.org/10.1162/089892999563283>
- 758 Schneider, D., Barth, A., Getzmann, S., & Wascher, E. (2017). On the neural mechanisms  
759 underlying the protective function of retroactive cuing against perceptual interference:  
760 Evidence by event-related potentials of the EEG. *Biological Psychology*, 124, 47–56.  
761 <https://doi.org/10.1016/j.biopsycho.2017.01.006>

- 762 Schneider, D., Mertes, C., & Wascher, E. (2016). The time course of visuo-spatial working  
763 memory updating revealed by a retro-cuing paradigm. *Scientific Reports*, 6, 21442.  
764 <https://doi.org/10.1038/srep21442>
- 765 Shimi, A., Nobre, A. C., Astle, D., & Scerif, G. (2014). Orienting Attention Within Visual  
766 Short-Term Memory: Development and Mechanisms. *Child Development*, 85(2), 578–592.  
767 <https://doi.org/10.1111/cdev.12150>
- 768 Souza, A. S., & Oberauer, K. (2016). In search of the focus of attention in working memory: 13  
769 years of the retro-cue effect. *Attention, Perception, & Psychophysics*, 78(7), 1839–1860.  
770 <https://doi.org/10.3758/s13414-016-1108-5>
- 771 Spaak, E., Watanabe, K., Funahashi, S., & Stokes, M. G. (2017). Stable and Dynamic Coding  
772 for Working Memory in Primate Prefrontal Cortex, 37(27), 6503–6516.  
773 <https://doi.org/10.1523/JNEUROSCI.3364-16.2017>
- 774 Stokes, M. G. (2015). ‘Activity-silent’ working memory in prefrontal cortex: a dynamic coding  
775 framework. *Trends in Cognitive Sciences*, 19(7), 394–405.  
776 <https://doi.org/10.1016/j.tics.2015.05.004>
- 777 Stokes, M. G., Kusunoki, M., Sigala, N., Nili, H., Gaffan, D., & Duncan, J. (2013). Article  
778 Dynamic Coding for Cognitive Control in Prefrontal Cortex. *Neuron*, 78(2), 364–375.  
779 <https://doi.org/10.1016/j.neuron.2013.01.039>
- 780 Tadel, F., Baillet, S., Mosher, J. C., Pantazis, D., & Leahy, R. M. (2011). Brainstorm: a  
781 user-friendly application for MEG/EEG analysis. *Computational Intelligence and*  
782 *Neuroscience*, 2011, 1–13. <https://doi.org/10.1155/2011/879716>
- 783 Tanoue, R. T., & Berryhill, M. E. (2012). The mental wormhole: Internal attention shifts without  
784 regard for distance. *Attention, Perception, and Psychophysics*, 74(6), 1199–1215.  
785 <https://doi.org/10.3758/s13414-012-0305-0>
- 786 Taulu, S., Kajola, M., & Simola, J. (2004). Suppression of interference and artifacts by the  
787 signal space separation method. *Brain Topography*, 16(4), 269–275.  
788 <https://doi.org/10.1023/B:BRAT.0000032864.93890.f9>
- 789 Theeuwes, J. (2010). Top-down and bottom-up control of visual selection. *Acta Psychologica*,  
790 123, 77–99. <https://doi.org/10.1016/j.actpsy.2010.02.006>
- 791 Van den Berg, R., Awh, E., & Ma, W. J. (2014). Factorial comparison of working memory  
792 models. *Psychological Review*, 121(1), 124–149. <https://doi.org/10.1037/a0035234>
- 793 Van Essen, D. C., Lewis, J. W., Drury, H. A., Hadjikhani, N., Tootell, R. B. H., Bakircioglu, M., &  
794 Miller, M. I. (2001). Mapping visual cortex in monkeys and humans using surface-based

795 atlases. *Vision Research*, 41(10), 1359–1378.  
796 [https://doi.org/https://doi.org/10.1016/S0042-6989\(01\)00045-1](https://doi.org/https://doi.org/10.1016/S0042-6989(01)00045-1)  
797 Vandenberghe, R., Gitelman, D. R., Parrish, T. B., & Mesulam, M. M. (2001). Functional  
798 Specificity of Superior Parietal Mediation of Spatial Shifting, 673, 661–673.  
799 <https://doi.org/10.1006/nimg.2001.0860>  
800 Williams, M., Hong, S. W., Kang, M.-S., Carlisle, N. B., & Woodman, G. F. (2013). The benefit  
801 of forgetting. *Psychonomic Bulletin & Review*, 20(2), 348–355.  
802 <https://doi.org/10.3758/s13423-012-0354-3>  
803 Yantis, S., Schwarzbach, J., Serences, J. T., Carlson, R. L., Steinmetz, M. A., Pekar, J. J., ...  
804 Brain, F. (2002). Transient neural activity in human parietal cortex during spatial attention  
805 shifts. *Nature Neuroscience*, 5(10), 995–1002. <https://doi.org/10.1038/nn921>  
806  
807

808

## 809 **METHODS**

810 **Subjects.** Sixty-four (age= $22.84 \pm 2.75$  years; 21 males), twenty  
811 (age= $21.07 \pm 2.69$  years; 6 males) and twenty-two subjects (age= $21.32 \pm 2.50$   
812 years; 10 males) were recruited in experiments 1, 2 and 4, respectively.  
813 Twenty-seven subjects (age= $21.43 \pm 2.18$  years; 14 males) participated in  
814 experiment 3. All had a normal or corrected-to-normal vision and had no history  
815 of psychiatric or neurological disorders. Written informed consent was provided  
816 by all participants prior to the experiment. Experimental protocols were  
817 approved by the local research ethics committee.

818

819 **Stimuli and experimental tasks.** The procedure is shown in Fig.1. Each trial  
820 started with a central fixation dot for 500 ms, followed by a memory display for  
821 another 500 ms. The display consisted of two or four Gabor patches (radius  $5^\circ$ ,  
822 contrast 100%, spatial frequency 2 cycles/degree) within an imaginary  
823 Cartesian coordinate system. Their orientations were chosen at random  
824 differed by at least  $10^\circ$  in each trial. The distance from the center of each Gabor  
825 patch to the axes was  $6.6^\circ$ . After a delay period lasting 2,000 ms, a probe with a  
826 randomly oriented Gabor patch was presented at the position that was early  
827 encoded. Participants were asked to recall the orientation of the mnemonic  
828 Gabor patch as precise as possible by rotating the probe using a mouse. In  
829 retro-cue trials, an endogenous retro-cue (a white arrow at the center,  $1.8^\circ$  by  
830  $1.28^\circ$ ) or an exogenous retro-cue (a dashed white circle at the probed location,  
831 radius  $5^\circ$ ) was presented for 100ms at the middle of the delay period. Following  
832 the retro-cue, a second delay period was presented for another 900ms. In no  
833 cue trials, the white fixation dot remained on the screen during the whole delay  
834 period, without any changes to it. The inter-trial interval was 1,000ms. At the  
835 beginning of the experiment, participants were instructed to maintain fixation on  
836 the central dot with minimum eye blinks during the first 3000ms in each trial.

837 In experiments 1, 2 and 4, the validity of retro-cues was always 100%  
838 correct, meaning that the probe always appeared at the cued position. Subjects  
839 were encouraged to make full use of the retro-cue (i.e., only covertly attend to  
840 the cued Gabor patch while ignoring the other Gabor patch(es)) in the retro-cue

841 trials. Before the experiments, participants were requested to perform 20  
842 practical trials. In both experiment 1 and 2, within-subject factors with cue types  
843 (endogenous cue vs. exogenous cue vs. no-cue) and memory loads (load-2 vs.  
844 load-4) were randomly mixed within each block. The whole experiment was  
845 divided into 8 blocks, each of which contained 72 trials.

846 In experiment 4, memory load was restricted to the load-2 condition, three  
847 cue types were randomly mixed within each block, each of which contained 72  
848 trials. There were 23 blocks in total.

849 In experiment 3, one of the two retro-cue types (endogenous or exogenous)  
850 and its corresponding cue validity (100% correct or 50% correct) were  
851 manipulated in different blocks. These four types of blocks alternated for twice,  
852 and thus there were 8 blocks in total. Each block contained 80 trials, and  
853 four-fifth of them were retro-cue trials, leaving the no-cue condition randomly  
854 mixed in the remaining trials. Prior to experiment, subjects performed a brief  
855 practice (10 trials per block type) outside of the MEG scanner, following the  
856 same order as in the experiment to become familiar with the task. Block  
857 sequences were counterbalanced between subjects.

858 Notably, Gabor patches in the memory display were presented at any two  
859 of four quadrants under the load-2 condition in experiment 1, while in following  
860 three experiments, the two Gabor patches were bilaterally presented at the  
861 screen to keep the balance of visual inputs at both sides.

862

863 **Behavioral analysis.** For each condition, the recall error was calculated by  
864 subtracting the response angle from the probe angle. Then, the standard  
865 deviation (Raw SD) of recall errors was calculated. Both the recall error and  
866 Raw SD values were adjusted for circular data by means of the CircStat toolbox  
867 for MATLAB® (Berens, 2009). Repeated measures ANOVA on Raw SD were  
868 conducted to identify the main effect of cue type (ATTENTION, experiment 1-4),  
869 memory load (LOAD, experiment 1-2), cue validity (experiment 3), stimulating  
870 position/time point (experiment 4), and their interactions. Adjusted p-values  
871 ( $p_{adj}$ ) were given by FDR correction when applying multiple comparisons.  
872 Partial eta squared ( $\eta_p^2$ ) and Cohen's  $d$  were given as measures of effect size.

873 In experiment 1, six participants were excluded due to poor performance  
874 (lower end in the group 99% confidence interval, the same below) in at least  
875 one condition or missing data, resulting in 58 subjects for further analysis. In  
876 experiment 2, only one subject was excluded from analysis due to poor  
877 performance. In experiment 3, Data acquisition for one subject was aborted  
878 upon the request of the participant. Another two subjects were excluded from  
879 data analysis due to poor performance. Thus, we analyzed behavioral data  
880 from 24 participants in experiment 3. In experiment 4, two out of twenty-two  
881 subjects were excluded from analysis due to poor performance.

882

883 **Pupil data analysis.** In experiment 1, we used an Eyelink 1000plus eye  
884 (SR Research, Canada) to monitor the trajectory of eye movements. Data from  
885 each participant's dominant eye was used. The pupil diameter was corrected  
886 by the baseline using the mean value of 100ms prior to the memory display on  
887 a trial-by-trial basis for each participant. To reduce the difference in pupil  
888 changes evoked by the differential sensory format of the cues, we focused on  
889 exploring the interaction between memory loads and cue types. Therefore, we  
890 conducted a 2-by-2 measures ANOVA with LOAD (load-2 vs. load-4) and  
891 ATTENTION (endogenous cue vs. exogenous cue) as independent variables  
892 at each time point. In a control analysis to eliminate the contamination from  
893 eye movements, good trials were selected off-line, in which fixation was  
894 maintained within 1.5° visual angle and no blink was observed throughout the  
895 first 3000ms in each trial. Finally, data from 34 participants were qualified and  
896 remained for further analysis, with at least 50 acceptable trials remaining in  
897 each experimental condition.

898

899 **EEG recording and preprocessing.** In experiment 2, we recorded the brain  
900 activities using electroencephalography (EEG). EEG signals were recorded  
901 continuously from 32 Ag/AgCl active electrodes (Easycap; Berlin, Germany)  
902 according to the international 10/20 System (Pivik et al., 1993). Vertical  
903 electrooculogram (VEOG) was measured by an additional electrode applied  
904 below the right eye. A BrainAmp DC-amplifier (BrainProducts; Gilching,  
905 Germany) sampled EEG and VEOG signals with a frequency of 1000Hz. A



906 250Hz low-pass filter was used and the impedance of electrodes was kept  
907 below 5k $\Omega$  during recording.

908 EEGLAB (Delorme & Makeig, 2004) was mainly used for data analysis. All  
909 channels were re-referenced offline to the averaged mastoids by means of the  
910 signal recorded from electrodes TP9 and TP10. EEG data were filtered with  
911 both 0.5Hz high-pass and 40Hz low-pass filters, and then divided into  
912 segments ranging from 700ms before to 3000ms after the onset of the memory  
913 display. The mean value of 200ms prior to the memory display was served as  
914 the baseline on trial-by-trial basis. Epochs containing artifacts, such as blinks  
915 or saccades, and excessive noise ( $\pm 75 \mu\text{V}$ ) at any electrode within -200 and  
916 +2500ms time window were excluded from further analyses. After this  
917 operation, EEG data from 15 subjects were qualified with at least 50 trials in  
918 each condition. To obtain contra- and ipsilateral activities evoked by retro-cues,  
919 electrodes from both hemispheres were exchanged in trials where subjects  
920 were cued to recall the right side of the memory display. Then, the mean  
921 amplitudes across trials at each electrode were calculated. As a result, the  
922 curves from the right hemisphere stood for contralateral activities, and that  
923 from the left hemisphere stood for ipsilateral activities.

924

925 **ERPs analysis.** ERPs were referred to the onset of retro-cues. Time ranges  
926 for analyzing PCN and Pd at posterior electrodes P7 and P8 were accordingly  
927 set to 350 – 450 ms and 580 – 680 ms, ADAN at anterior electrodes F3 and F4  
928 were tested in the time window of 300 – 500 ms, in line with previous studies  
929 (Schneider, Barth, Getzmann, & Wascher, 2017; Schneider, Mertes, &  
930 Wascher, 2016). Posterior P1pc and anterior P1ac were identified when  
931 amplitudes approached their peaks within time ranges for P1 (100-160ms in  
932 our study). For statistical analyses, we conducted 2-by-3-by-2 repeated  
933 measures ANOVAs with LOAD (load-2 vs. load-4), ATTENTION (endogenous  
934 cue vs. exogenous cue vs. no cue) and hemispheres (contralateral vs.  
935 ipsilateral to cued side) as within-subject factors. Lateralized effects were  
936 further ensured using paired *t*-tests (i.e. contralateral vs. ipsilateral to the cued  
937 side) for each condition. To investigate lateralized differences between two  
938 types of retro-cues, paired *t*-tests were calculated for each memory load with



939 mean amplitudes or latencies of event-related lateralization (ERL) within the  
940 corresponding time window as dependent variables.

941

942 **MEG procedure and preprocessing.** In experiment 3, anatomical MRI scans  
943 were always conducted after MEG recordings. A T1-weighted image was  
944 acquired with a Siemens 3-Tesla Prisma scanner (192 sagittal slices, 1mm  
945 thick, TR=2.53s, TE=2.98ms, flip angle=7°, FOV=22.4 cm \*25.6cm) in 17  
946 subjects or with a GE scanner (192 sagittal slices, 1mm thick, TR =6.64ms,  
947 TE=2.93ms, flip angle=12°, FOV=25.6cm \*25.6cm) in another 10 subjects (out  
948 of 27). The cortex with 1 mm \*1 mm \*1 mm resolution was then extracted using  
949 the FreeSurfer toolbox, for estimating the source activity in the brain (Reuter,  
950 Schmansky, Rosas, & Fischl, 2012).

951 MEG data were obtained with a whole-head 306-channel Vector view  
952 system (Elekta-Neuromag, Helsinki, Finland), consisting of 102  
953 magnetometers and 204 orthogonal planar gradiometers. The signal was  
954 recorded at a sampling rate of 1000Hz with an online bandpass filter from 0.1  
955 to 250Hz. The head position was measured at the beginning of the experiment  
956 with six head position indicator coils. Anatomical landmarks (nasion, brow, left  
957 and right ear) and extra points (~100) of the head shape were obtained using a  
958 3D digitizer (Fastrak Polhemus, Colchester, VA, USA). External noise was  
959 removed with a signal space separation (SSS) method implemented with MAX  
960 filter software (Taulu, Kajola, & Simola, 2004). Head positions in the following  
961 runs were re-aligned to the position measured in the first run. During this step,  
962 MEG data from two subjects were further excluded due to a technical failure,  
963 thus we analyzed the remaining MEG data from 22 subjects. Further analyses  
964 were conducted with custom scripts based on Brainstorm toolbox (Tadel,  
965 Baillet, Mosher, Pantazis, & Leahy, 2011) for MATLAB®. Continuous data  
966 were notch filtered using 50, 100, and 150Hz filters, and then band-pass  
967 filtered between 1 and 100Hz. Muscular artifacts and eye blinks were  
968 evaluated with ICA, and were visually inspected and manually removed.  
969 Remaining data were then cut into 2600ms corresponding to 100ms before the  
970 memory display and 2500ms after the onset of memory display. Event-related  
971 field (ERF) analysis was conducted on 102 magnetometer channels.

972

973 **Source localization and selection of ROIs.** MEG signals in the empty room,  
974 serving as covariance for noise modeling, were recorded prior to the formal  
975 experiment. We calculated the forward model using the method of overlapping  
976 spheres for each subject, and then applied the Minimum norm model (current  
977 density map) to estimate source activities for trials of each block. Next, neural  
978 activations at the source level for each condition were extracted and then  
979 averaged across trials before performing low-pass filter (below 32Hz) and  
980 z-score transformation. After this, absolute values for each condition from per  
981 subject were calculated and projected onto the MNI template. Two clusters  
982 including the right intraparietal sulcus (IPS) and left DLPFC displayed  
983 significantly larger neural activation in both cued conditions vs. no-cue  
984 condition in the post-cue period of 0-500 ms (permutation test  $\alpha < 0.05$ ). To  
985 compare differences between two types of retro-cue conditions, paired *t*-tests  
986 were used with their latencies of brain responses within specific time windows  
987 (i.e., 100-300ms or 300-500ms after cue onset) as dependent variables.  
988 Pearson correlations between neural activations and behavior were applied to  
989 these brain regions, respectively.

990

991 **Granger causality analysis.** It has been well documented that the superior  
992 parietal lobe (SPL) and inferior parietal lobe (IPL) are involved in voluntary and  
993 involuntary attentional processing, respectively (Corbetta & Shulman, 2002).  
994 To evaluate how the information from visual cortex interacted with these two  
995 regions, and also, how it received regulation from prefrontal cortex relating to  
996 behavior, the lateral occipital cortex (LOC) and dorsal lateral prefrontal cortex  
997 (DLPFC) were recruited for the analysis. To achieve this, we extracted time  
998 courses of these four brain regions, within a post-cue 1000ms time period,  
999 based on the Desikan-Killiany labeling system (Desikan et al., 2006). We then  
1000 put them into the Multivariate Granger Causality (mvgc) toolbox (Barnett &  
1001 Seth, 2014) to perform the Granger causality analysis, where a length of  
1002 200ms per time window stepped by 100ms was applied. Multiple comparisons  
1003 were corrected using Bonferroni correction at a significant level of 0.05.

1004

1005       **TMS procedure.** In experiment 4, anatomical T1-weighted magnetic  
1006 resonance imaging (MRI) scans were always conducted preceding TMS  
1007 sessions in a different day (interval >48h). They were acquired with a Siemens  
1008 3-Tesla Prisma scanner (192 sagittal slices, 1mm thick, TR=2.53s, TE=2.98ms,  
1009 flip angle=7°, FOV=25.6 cm \*25.6cm) at the ECNU MRI Research Center.  
1010 These images were then imported into the BrainSight neuronavigation  
1011 software (BrainSight 2.0, Rogue Research, Montreal, Canada) to allow for  
1012 stereotaxic registration of the coil with the brain. TMS was delivered via  
1013 Magstim Rapid2 stimulator and a 70-mm figure-of-eight coil (The Magstim  
1014 Company, Whitland, UK). The TMS intensity for each subject was calculated  
1015 as 90% of phosphene threshold (output= 55%±6.5%). The threshold was  
1016 determined as subjects perceived phosphenes in 5 out of 10 TMS pulses given  
1017 at the lateral occipital (LO) region, localized to be 1–1.5 cm caudal on the skull  
1018 in a direct line towards the inion in accordance with various anatomical and  
1019 functional maps (Van Essen et al., 2001).

1020       During the experiment, TMS was applied to either the left dorsal lateral  
1021 prefrontal cortex (IDLDFC, MNI coordinates: x=-29, y= 33.0, z=28.5) or the  
1022 right intraparietal sulcus (rIPS, MNI coordinates: x=24.8, y=-64.2, z=41.7) in 20  
1023 blocks, whose MNI coordinates were acquired as the maximal activation  
1024 observed in experiment 3. Their stimulation sequence was counterbalanced  
1025 between subjects. Importantly, we also recruited vertex as a control area  
1026 where behavioral performance was supposed to be unaffected by stimulation.  
1027 TMS applied to vertex was always arranged at the 1st,12th (middle) and 23rd  
1028 (last) blocks to match subject' states in other blocks which may be influenced  
1029 by the practice effect as well as the fatigue effect.

1030       In each trial, a single pulse TMS was applied at one of three time points  
1031 (100, 400 and 700ms after the (no) cue onset) in a pseudo-random order. We  
1032 collapsed data with different stimulating time points when TMS was applied to  
1033 vertex. Therefore, the IDLDFC- or rIPS-targeted stimulation condition (each  
1034 cue type \* each time point) consisted of 80 trials each, and the vertex-targeted  
1035 stimulation condition contained 72 trials per cue type.

1036  
1037

1038

1039 SUPPLEMENTARY FIGURES

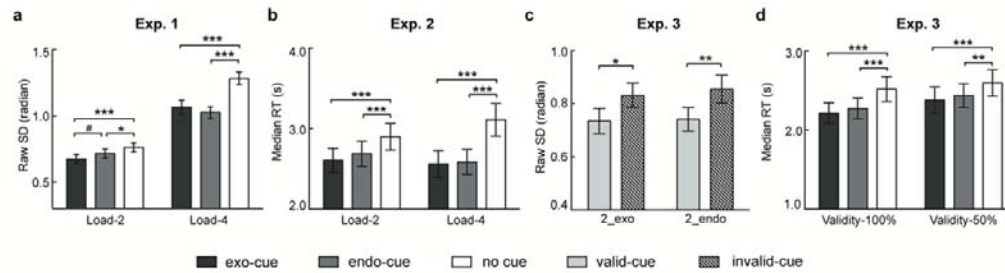

1040

1041 **Supplementary figure 1 | Behavioral results.** a, Behavioral results from experiment 1

1042 after controlling eye movements and blinks ( $n=34$ ). b, Median reaction times (RTs) from

1043 experiment 2 ( $n=19$ ). c, Behavioral results from experiment 3 for retro-cue trials with 50%

1044 cue validity ( $n=24$ ). d, Median RTs from experiment 3. #  $p<0.1$ , \*  $p<0.05$ , \*\*  $p<0.01$ , \*\*\*

1045  $p<0.001$ , all  $p$ -values are FDR corrected.

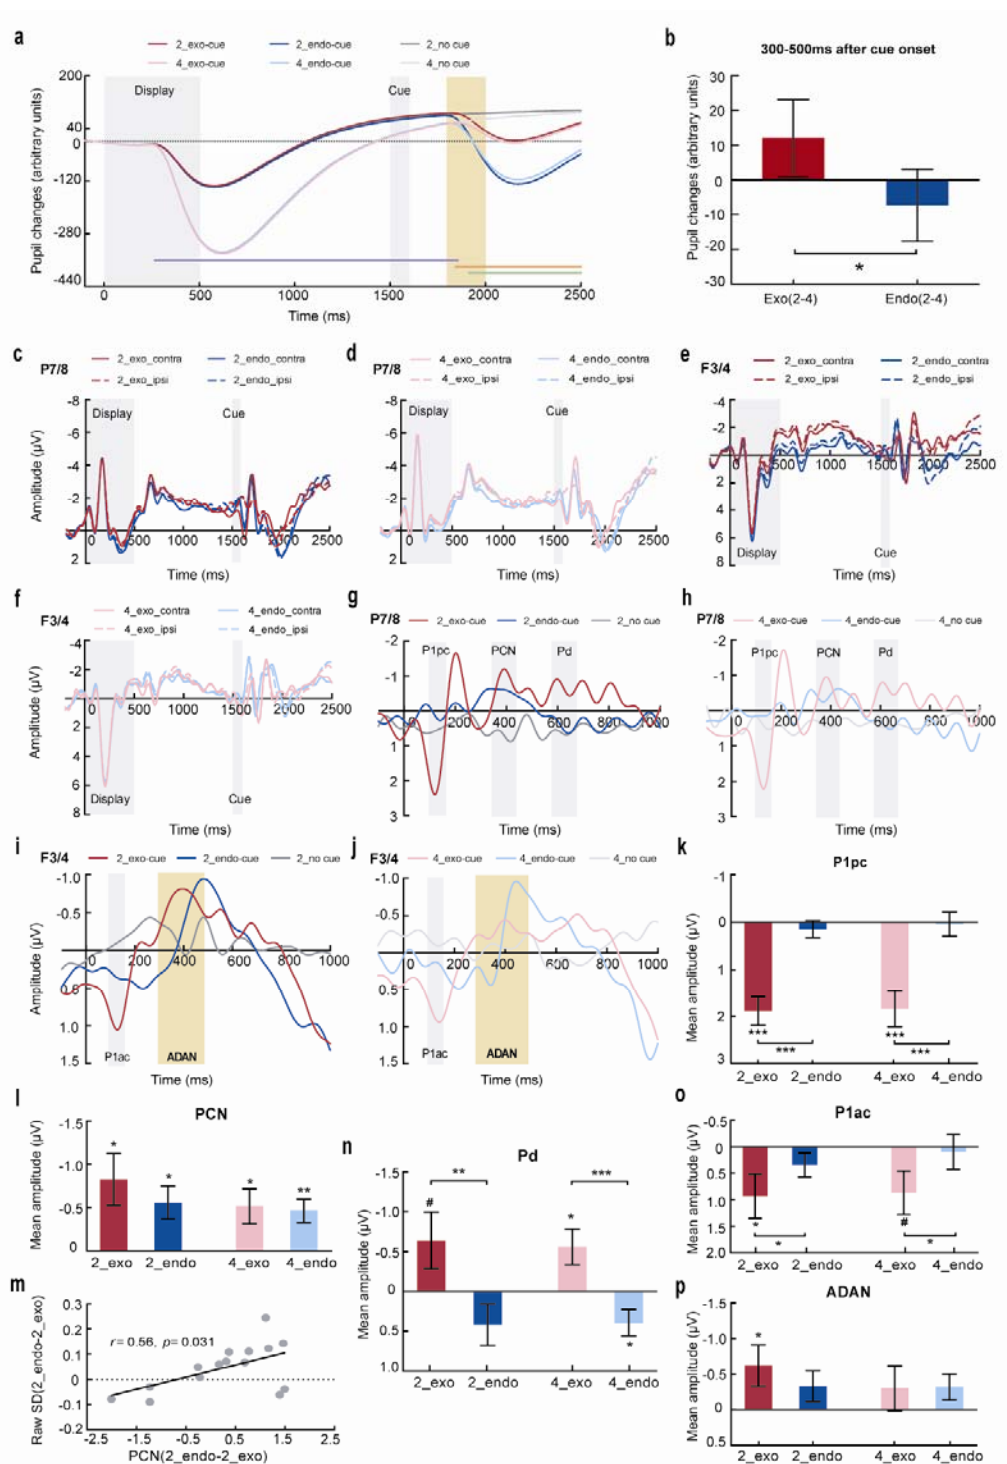

1046

1047

1048

1049

1050

1051

**Supplementary figure 2 | Psychophysiological results from experiment 1 and 2. a,** Pupil changes using qualified trials from 34 subjects as a function of time referred to the memory display. Purple dots indicate a main effect of LOAD, orange dots indicate a main effect of ATTENTION, and green dots indicate a 2-by-2 interaction. **b,** Load-by-cue interactions within the time window of 300-500 ms after the cue onset. **c-f,** The original

1052 curves referred to memory display at P7/8 electrodes (c-d) and F3/4 electrodes (e-f). **g-j**,  
1053 The contra- minus ipsilateral curves time-locked to the cue onset at P7/8 electrodes (g-h)  
1054 and F3/4 electrodes (i-j). **k**, Mean amplitudes of P1ac. **l**, Mean amplitudes of PCN. **m**,  
1055 Correlations between endo- minus exogenous PCN differences at the load-2 condition and  
1056 their behavioral differences at the load. **n-p**, Mean amplitudes of Pd (n), P1ac (o), ADAN  
1057 (p). #  $p < 0.1$ , \*  $p < 0.05$ , \*\*  $p < 0.01$ , \*\*\*  $p < 0.001$ .  
1058

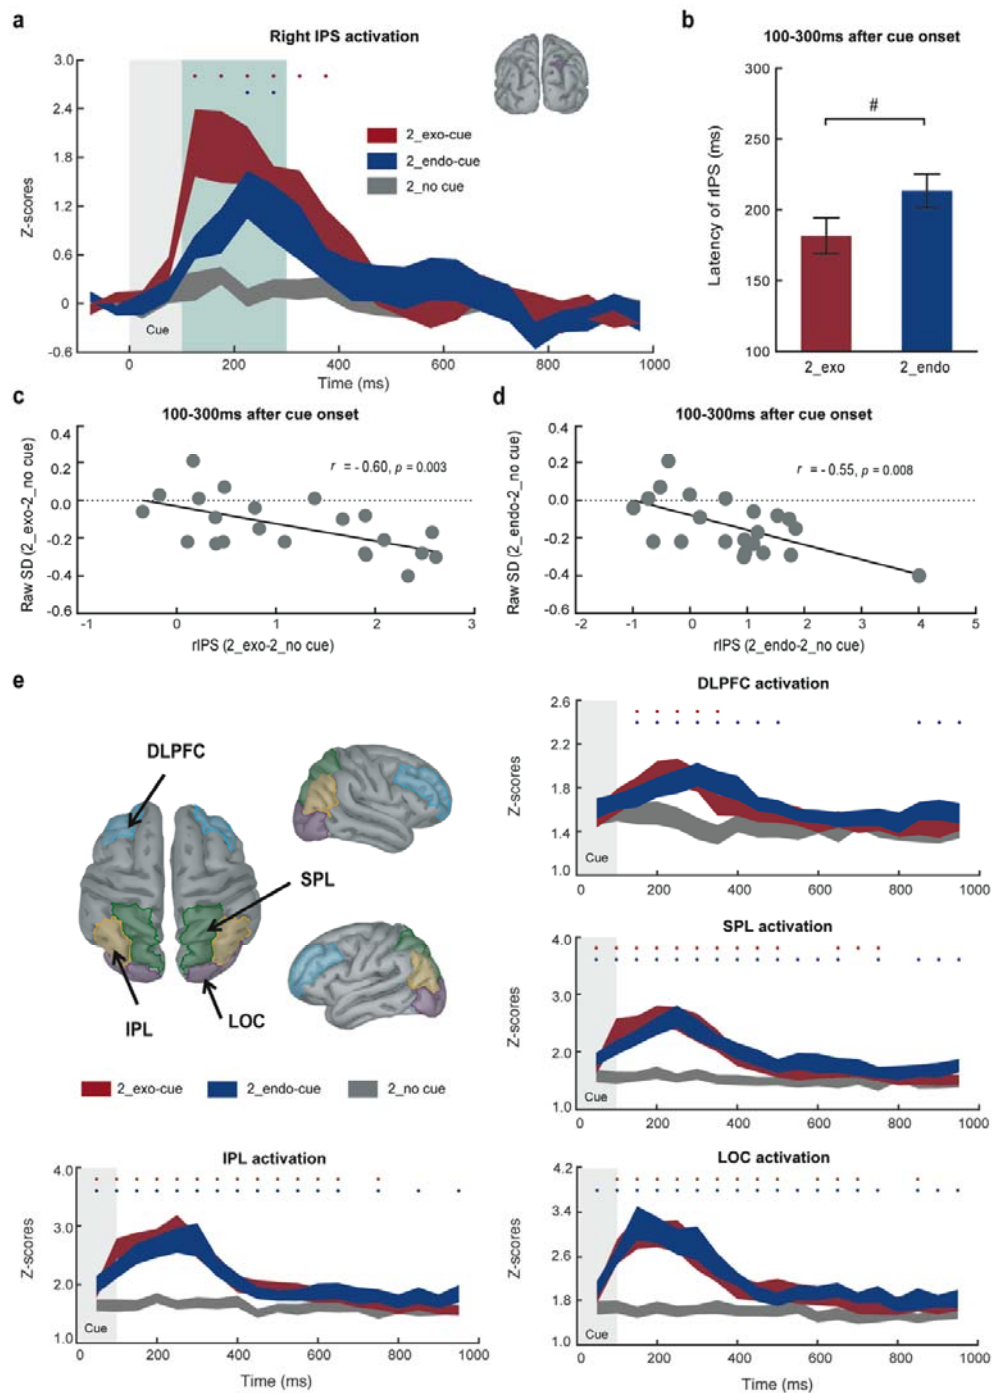

1059

1060 **Supplementary figure 3 | Psychophysiological results from experiment 3. a-b,** Grand

1061 event-related field time-locked to memory display in blocks with 100% validity. Red (blue)

1062 dots indicate higher brain responses to exogenous (endogenous) retro-cues than to no cue

1063 condition (one-tailed  $t$ -tests,  $p < 0.05$ ). b, The latency of rIPS activation within the range of

1064 100-300 ms after cue onset for retro-cue conditions. (#  $p < 0.1$ ). **c-d,** Correlations in blocks

1065 with 100% validity between the activation differences of exogenous (c) or endogenous (d)  
1066 retro-cue relative to no cue conditions at rIPS and their behavioral differences within the  
1067 time window of 100-300 ms after the cue onset (two-tailed  $t$ -tests,  $p < 0.05$ ). **e**, ROIs on a  
1068 template and z-transferred grand responses within these ROIs in blocks with 100% validity  
1069 time-locked to the cue onset. Red (blue) dots indicate higher responses to an exogenous  
1070 (endogenous) retro-cue than to no cue (one-tailed  $t$ -tests,  $p < 0.05$ ).  
1071
